# Supplementary material for: Neoadjuvant Treatment with HER2-Targeted Therapies in HER2-Positive Breast Cancer: A Systematic Review and Network Meta-Analysis
Source: MDPI journal article supplement (doi:10.3390/cancers14030523), 2022-01-21
Supplement: s1 [file s1]

# Neoadjuvant Treatment with HER2 Targeted Therapies in HER2 Positive Breast Cancer: A Systematic Review and Network Meta-Analysis

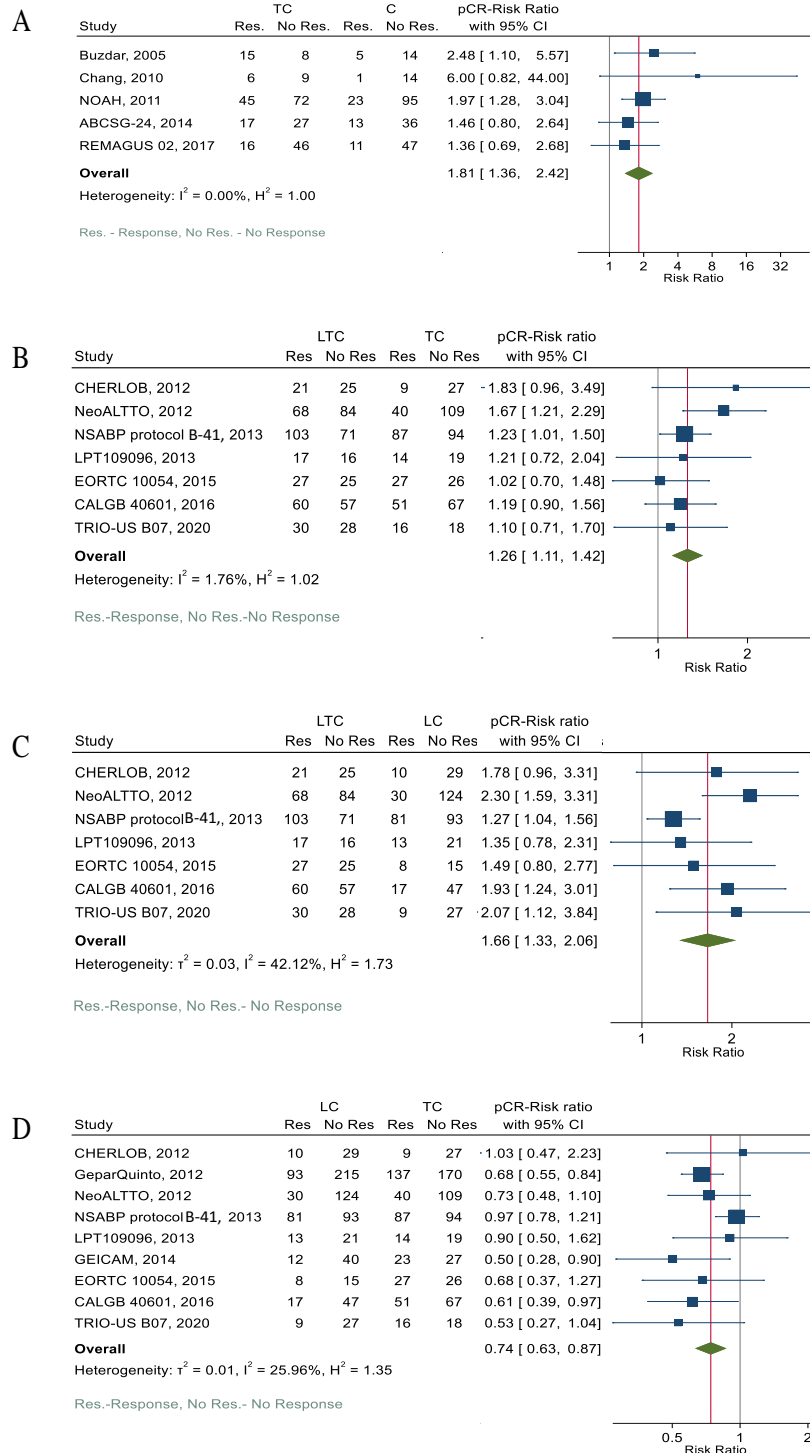

**Figure S1.** Forest plots of pairwise meta-analyses for pathological complete response (pCR). (A) TC vs C; (B) LTC vs TC; (C) LTC vs LC; (D) LC vs TC. C = Chemotherapy; TC = Trastuzumab + chemotherapy; LTC = Lapatinib + trastuzumab + chemotherapy; LC = Lapatinib + chemotherapy.

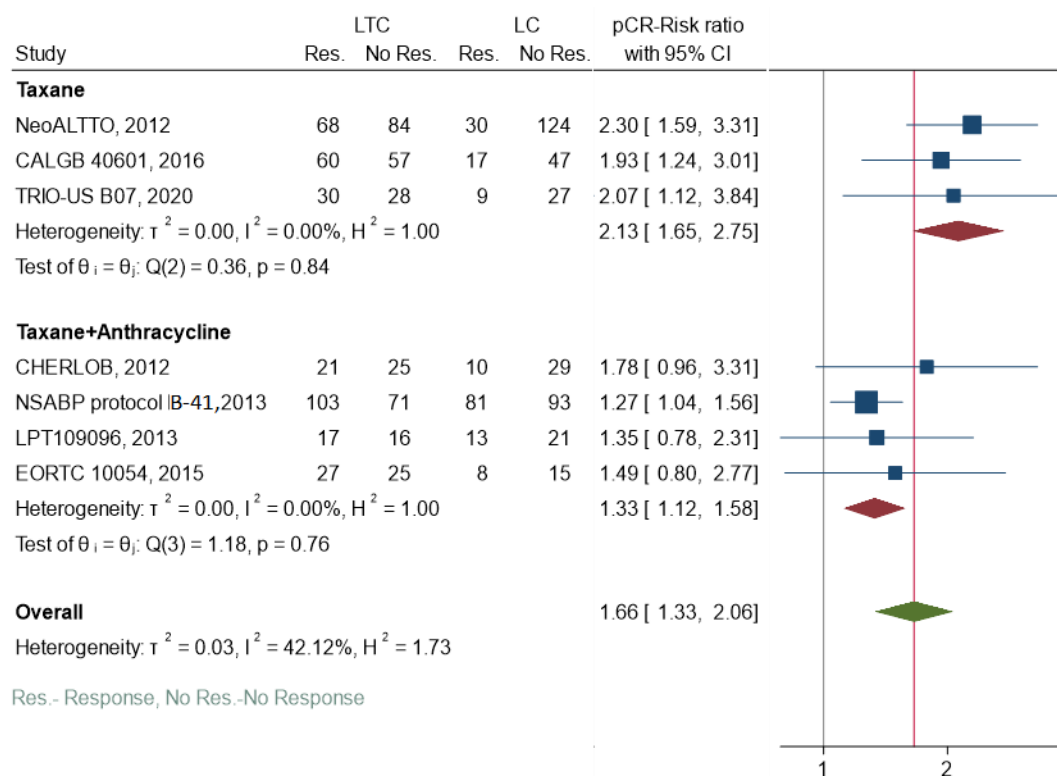

**Figure S2.** Subgroup analysis of pathological complete response (pCR) in LTC vs. LC according to types of chemotherapy. LTC = Lapatinib + trastuzumab +chemotherapy; LC = Lapatinib + chemotherapy.

A) TC vs C Funnel plot

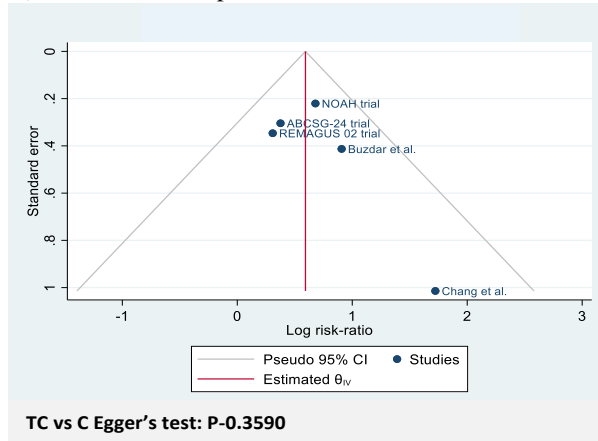

B) TC vs C Contour enhanced funnel plot

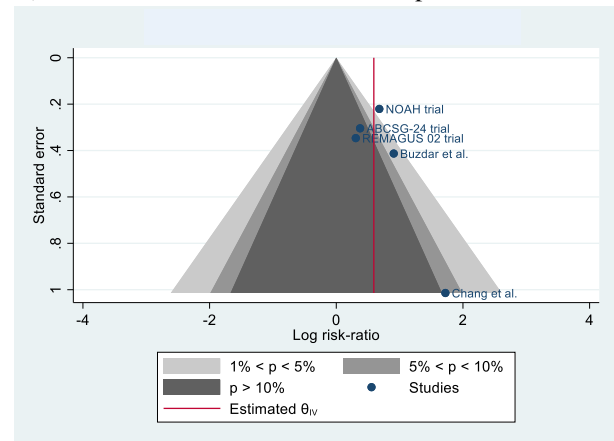

C) LC vs TC Funnel plot

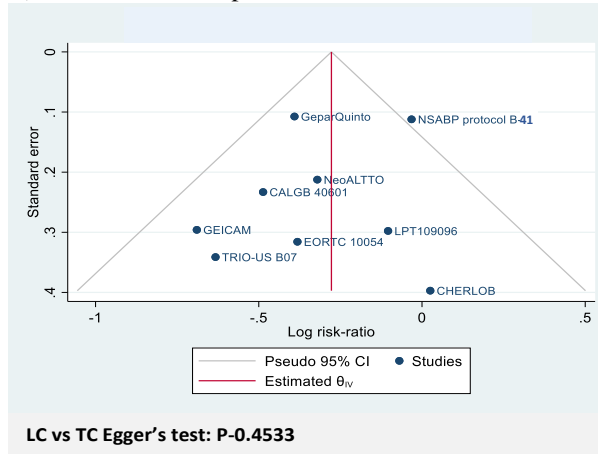

D) LTC vs TC Funnel plot

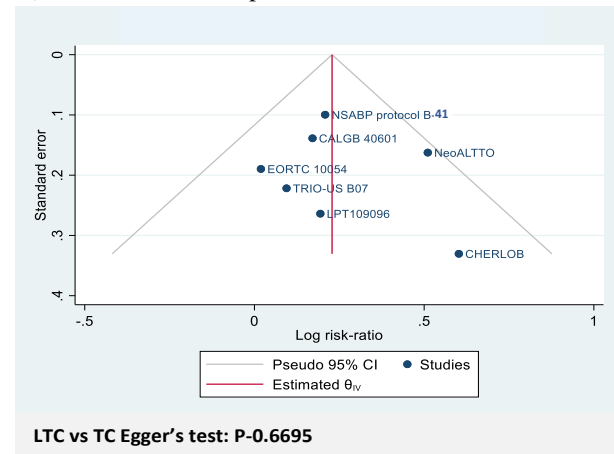

E) LTC vs LC Funnel plot

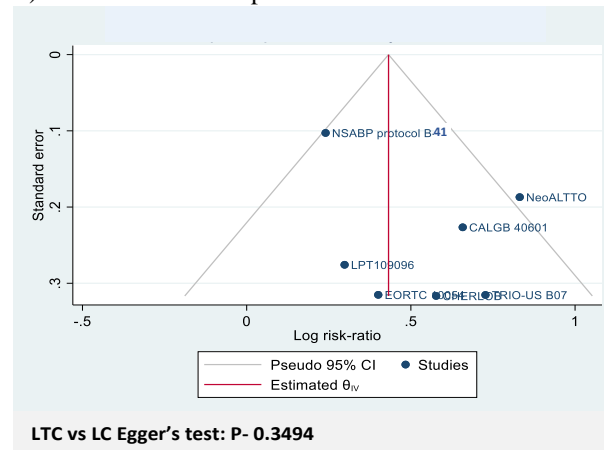

**Figure S3.** Funnel plots and contour enhanced funnel plots of pairwise meta-analyses comparisons for pathological complete response (pCR). (A) TC vs C Funnel plot; (B) TC vs C Contour enhanced funnel plot; (C) LC vs TC Funnel plot; (D) LTC vs TC Funnel plot; (E) LTC vs LC Funnel plot. C = Chemotherapy; TC = Trastuzumab + chemotherapy; LTC = Lapatinib + trastuzumab + chemotherapy; LC = Lapatinib + chemotherapy.

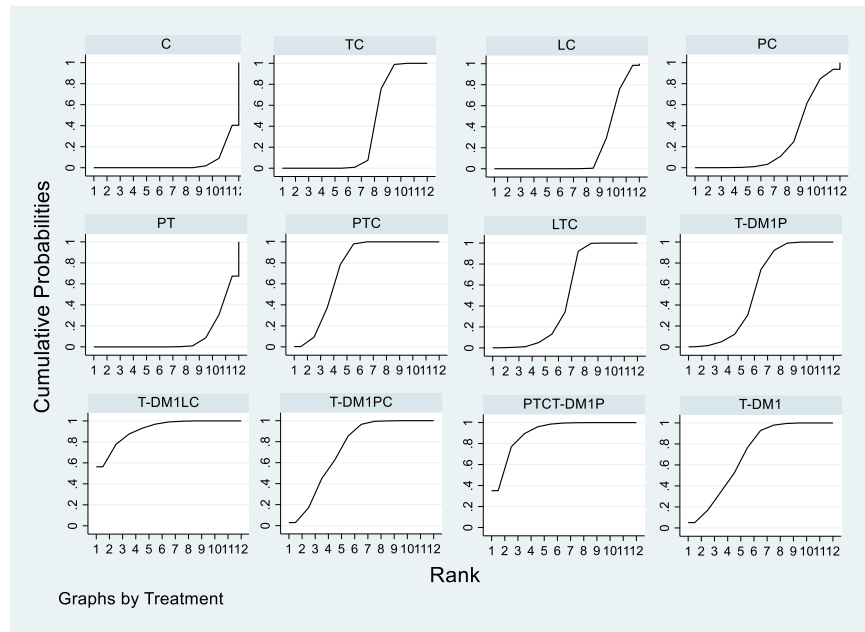

| Treatment  | SUCRA | PrBest | MeanRank |
|------------|-------|--------|----------|
| C          | 4.6   | 0      | 11.5     |
| TC         | 34.8  | 0      | 8.2      |
| PC         | 25.5  | 0      | 9.2      |
| LC         | 18.6  | 0      | 10       |
| PT         | 9.8   | 0      | 10.9     |
| T-DM1P     | 55.8  | 0.2    | 5.9      |
| PTC        | 74.8  | 0.3    | 3.8      |
| LTC        | 49.7  | 0.1    | 6.5      |
| T-DM1LC    | 91.9  | 56.3   | 1.9      |
| T-DM1PC    | 73.5  | 2.9    | 3.9      |
| PTC_T-DM1P | 90.5  | 35.1   | 2        |
| T-DM1      | 70.5  | 5.1    | 4.2      |

**Figure S4.** Surface under the cumulative ranking curves (SUCRA) for pathological complete response (pCR). C = Chemotherapy; TC = Trastuzumab + chemotherapy, PC = Pertuzumab + chemotherapy; LC = Lapatinib + chemotherapy; PTC = Pertuzumab + trastuzumab + chemotherapy; PT = Pertuzumab + trastuzumab; T-DM1LC = Trastuzumab emtansine + lapatinib + chemotherapy; T-DM1PC = Trastuzumab emtansine + pertuzumab + chemotherapy; PTC\_T-DM1P = Pertuzumab + trastuzumab + chemotherapy followed by trastuzumab emtansine + pertuzumab; T-DM1 = Trastuzumab emtansine.

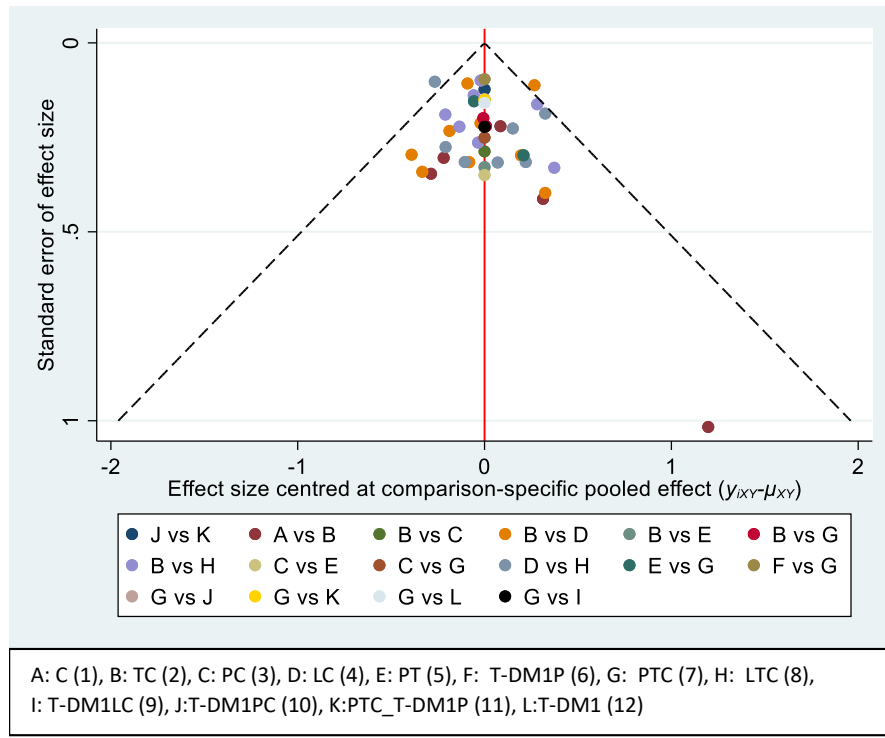

**Figure S5.** Comparison adjusted funnel plot of network meta-analysis of pathological complete response (pCR). C = Chemotherapy; TC = Trastuzumab + chemotherapy; LTC = Lapatinib + trastuzumab + chemotherapy; LC = Lapatinib + chemotherapy; T-DM1LC = trastuzumab emtansine + lapatinib + chemotherapy; T-DM1PC = Trastuzumab emtansine + pertuzumab + chemotherapy; T-DM1P = Trastuzumab emtansine + pertuzumab; PTC\_T-DM1P = pertuzumab + trastuzumab + chemotherapy followed by trastuzumab emtansine + pertuzumab; T-DM1 = Trastuzumab emtansine.

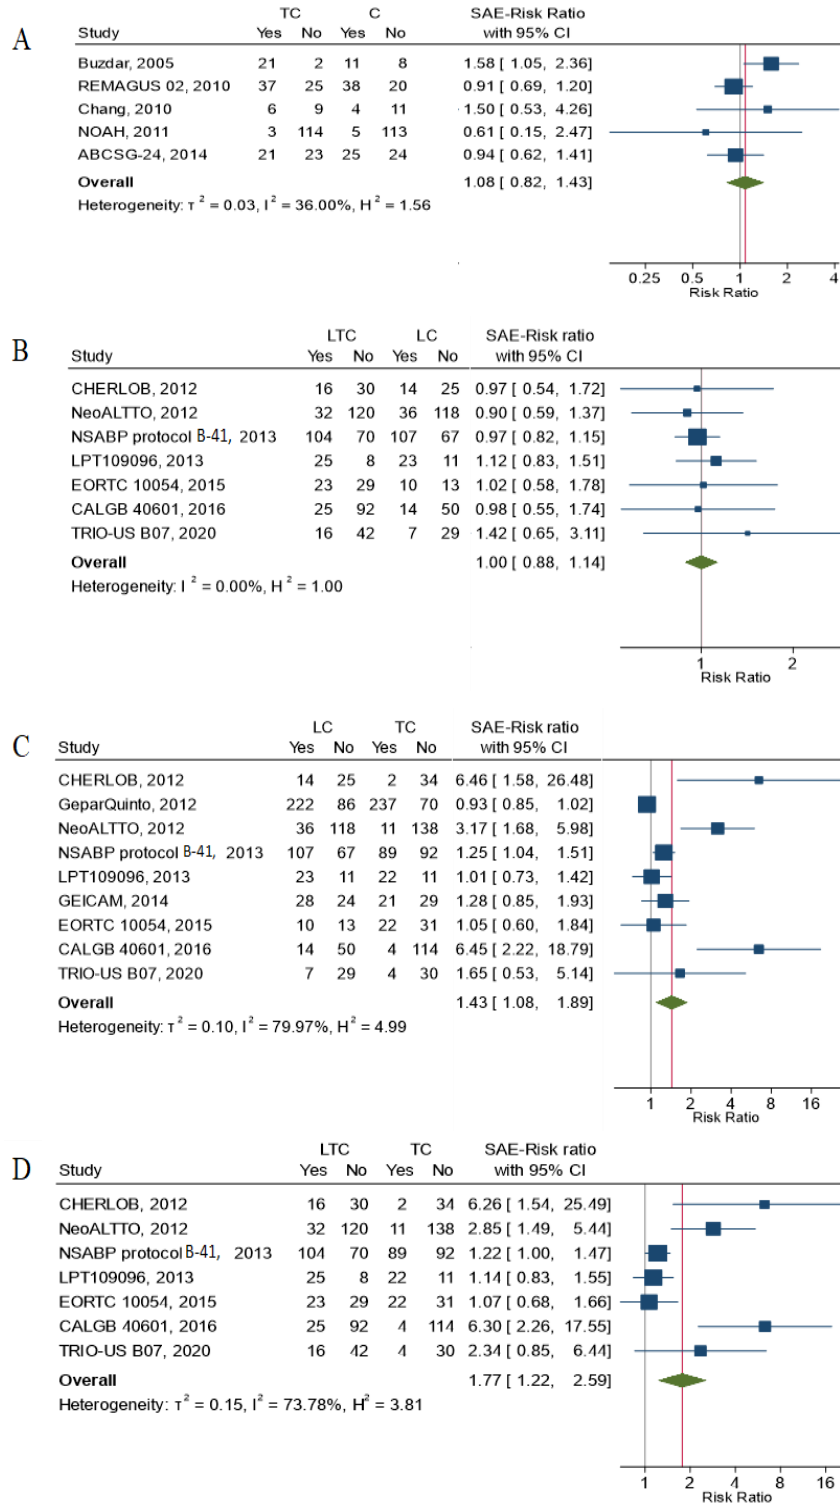

**Figure S6.** Forest plots of pairwise meta-analyses for serious adverse events (SAE). **(A)** TC vs C; **(B)** LTC vs LC; **(C)** LC vs TC; **(D)** LTC vs TC. C = Chemotherapy; TC = Trastuzumab + chemotherapy; LTC = Lapatinib + trastuzumab + chemotherapy; LC = Lapatinib + chemotherapy.

A

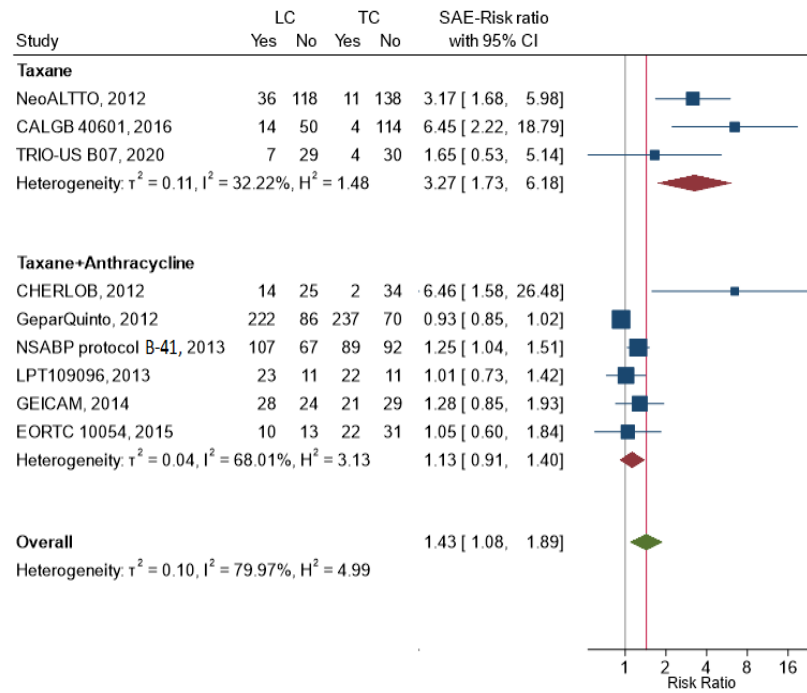

B

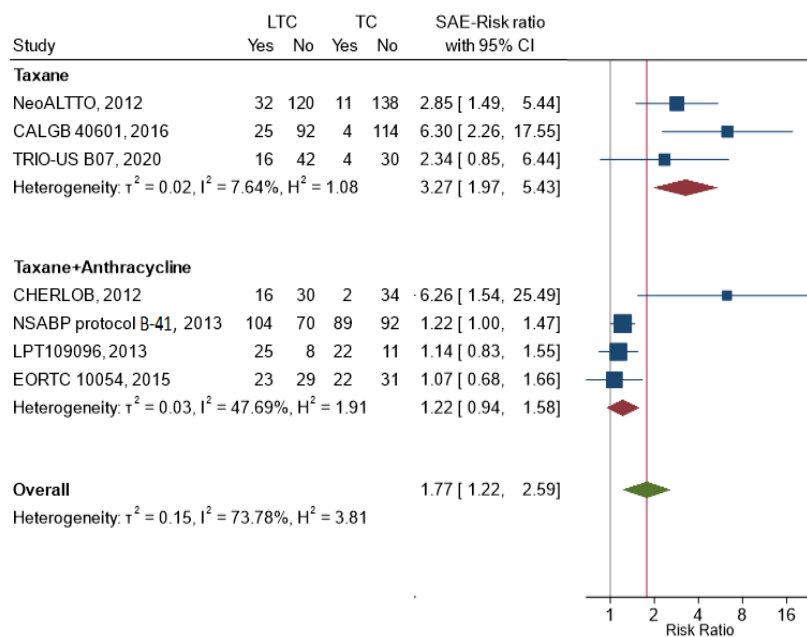

**Figure S7.** Subgroup analyses according to types of chemotherapy for serious adverse events (SAE). (A) LC vs TC; (B) LTC vs TC. C = Chemotherapy; TC = Trastuzumab + chemotherapy; LTC = Lapatinib + trastuzumab + chemotherapy; LC = Lapatinib + chemotherapy.

A) TC vs C Funnel plot

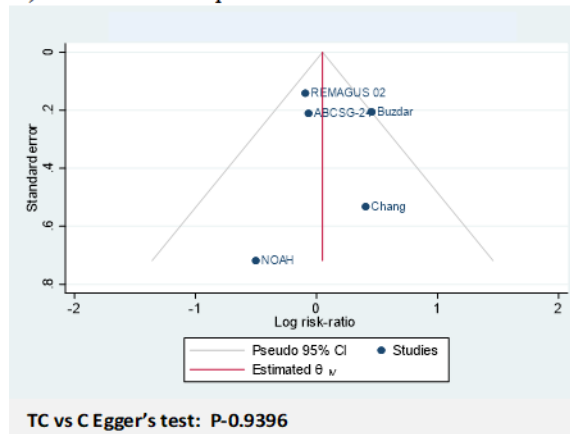

B) LC vs TC Funnel plot

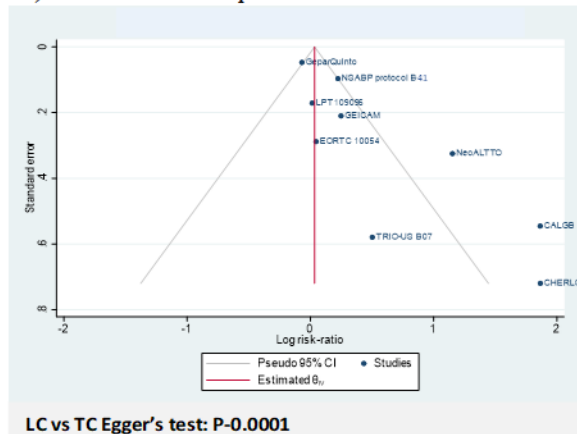

C) LC vs TC contour enhanced funnel plot

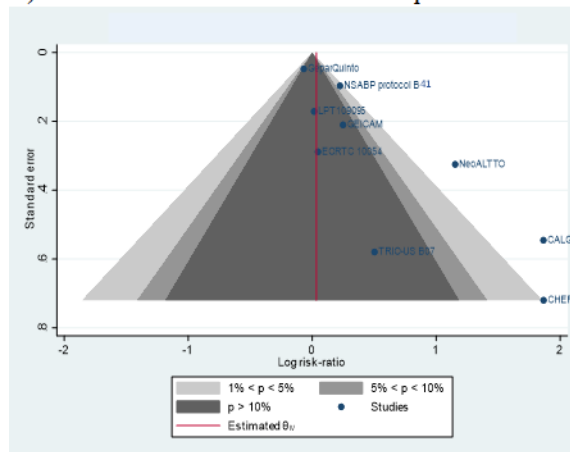

D) LTC vs TC Funnel plot

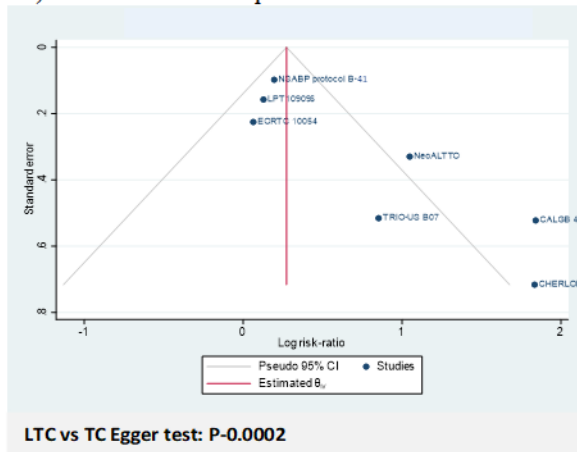

E) LTC vs TC contour enhanced funnel plot

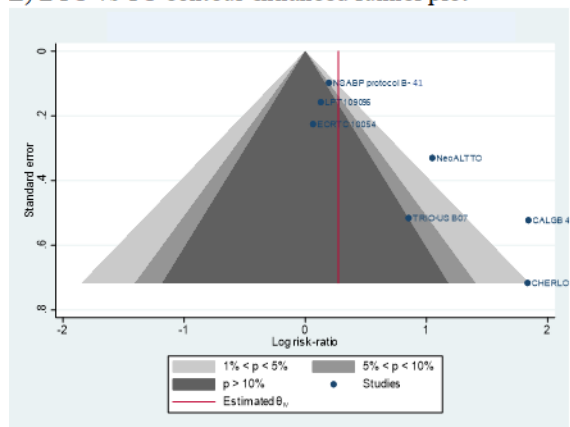

F) LTC vs LC Funnel plot

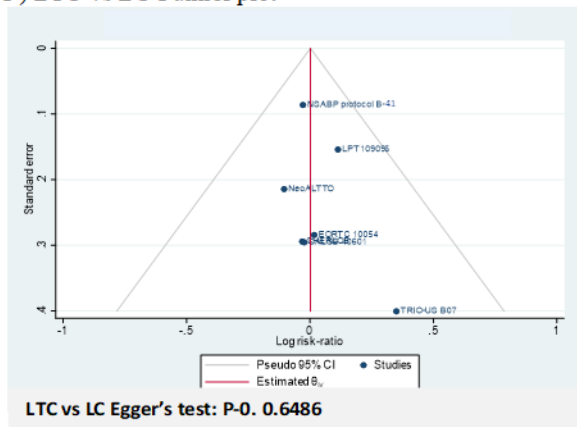

**Figure S8.** Funnel plots and contour enhanced funnel plots of pairwise meta-analyses for serious adverse events (SAE). (A) TC vs C Funnel plot; (B) LC vs TC Funnel plot; (C) LC vs TC Contour enhanced funnel plot; (D) LTC vs TC Funnel plot; (E) LTC vs TC Contour enhanced funnel plot; (F) LTC vs LC Funnel plot. C = Chemotherapy; TC = Trastuzumab + chemotherapy; LTC = Lapatinib + trastuzumab + chemotherapy; LC = Lapatinib + chemotherapy.



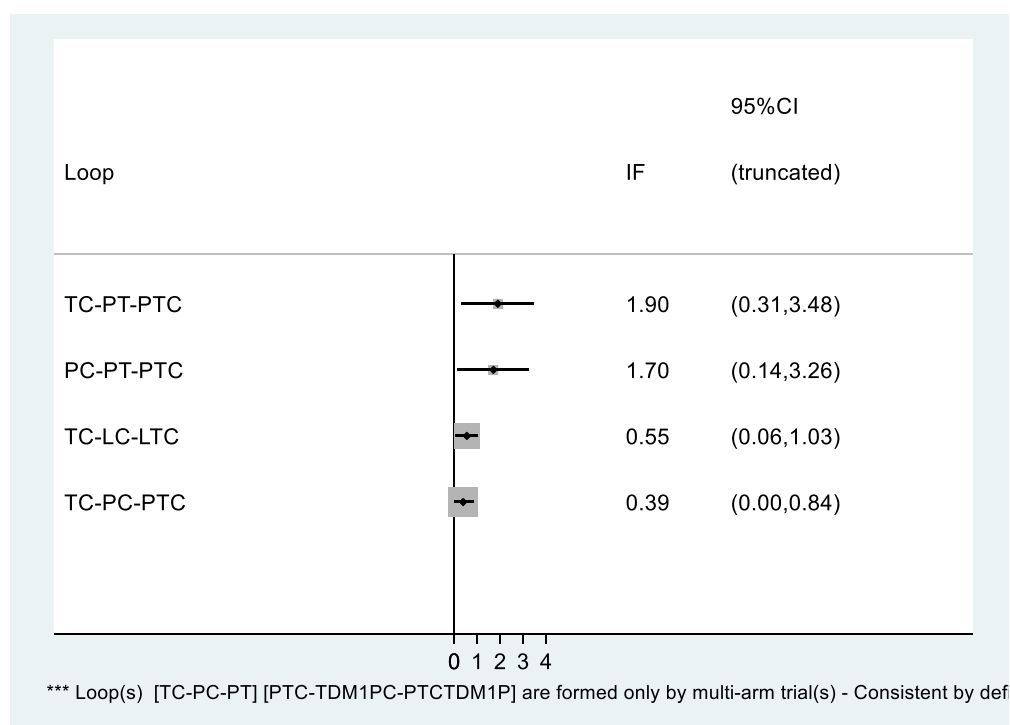

**Figure S9.** Inconsistency factor plot in network meta-analysis for serious adverse events (SAE). C = Chemotherapy; TC = Trastuzumab + chemotherapy; LTC = Lapatinib + trastuzumab + chemotherapy; LC = Lapatinib + chemotherapy.

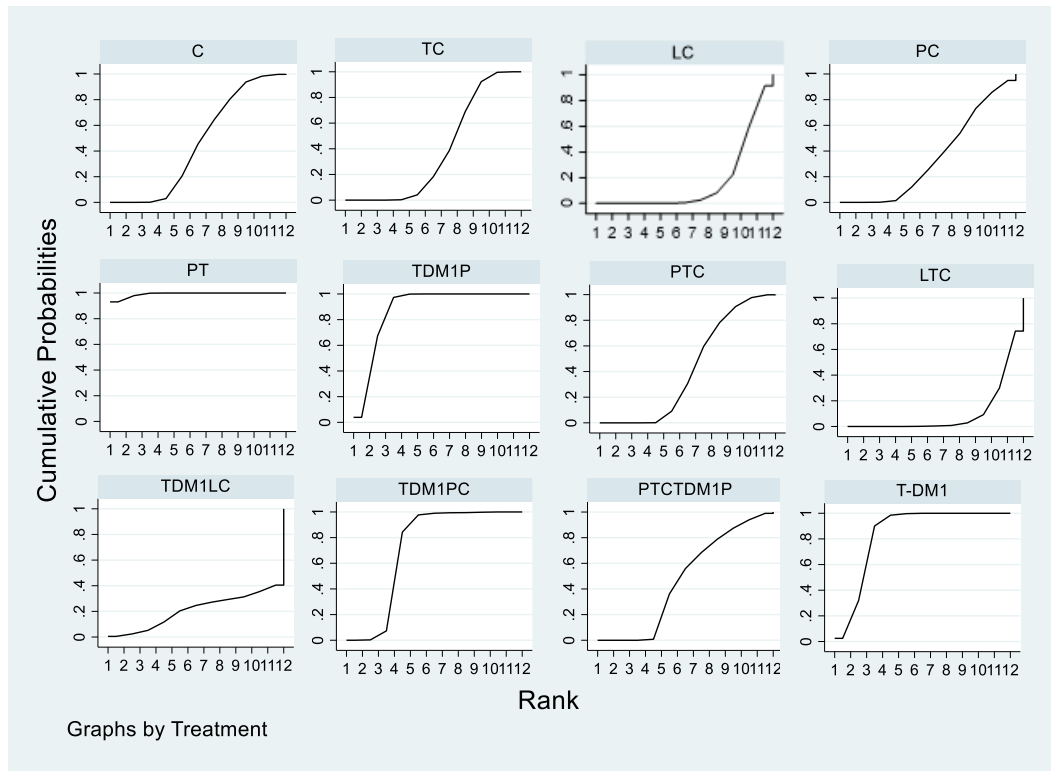

| Treatment  | SUCRA | PrBest | MeanRank |
|------------|-------|--------|----------|
| C          | 46    | 0      | 6.9      |
| TC         | 38.4  | 0      | 7.8      |
| PC         | 35.1  | 0      | 8.1      |
| LC         | 16.8  | 0      | 10.2     |
| PT         | 99.2  | 93.1   | 1.1      |
| T-DM1P     | 88    | 3.9    | 2.3      |
| PTC        | 42.4  | 0      | 7.3      |
| LTC        | 10.7  | 0      | 10.8     |
| T-DM1LC    | 20.8  | 0.5    | 9.7      |
| T-DM1PC    | 71.6  | 0      | 4.1      |
| PTC_T-DM1P | 47.3  | 0      | 6.8      |
| T-DM1      | 83.9  | 2.5    | 2.8      |

**Figure S10.** Surface Under the Cumulative Ranking Curves (SUCRA) for serious adverse events (SAE). C = Chemotherapy; TC = Trastuzumab + chemotherapy = PC = Pertuzumab + chemotherapy; LC = Lapatinib + chemotherapy; PTC = Pertuzumab + trastuzumab + chemotherapy; P = trastuzumab emtansine+ pertuzumab; T-DM1LC = trastuzumab emtansine +lapatinib + chemotherapy; T-DM1PC = trastuzumab emtansine +pertuzumab + chemotherapy; PTC\_T-DM1P = pertuzumab + trastuzumab + chemotherapy followed by trastuzumab emtansine + pertuzumab; T-DM1 = Trastuzumab emtansine.

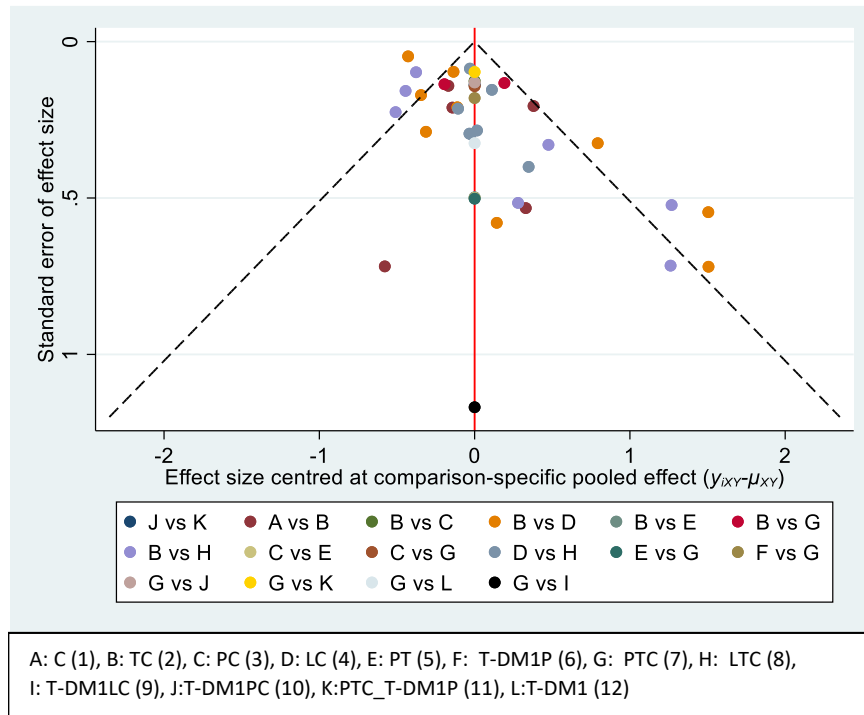

**Figure S11.** Comparison adjusted funnel plot of network meta-analysis for serious adverse events (SAE). C = Chemotherapy; TC = Trastuzumab + chemotherapy; LTC = Lapatinib + trastuzumab + chemotherapy; LC = Lapatinib + chemotherapy; T-DM1LC = trastuzumab emtansine + lapatinib + chemotherapy; T-DM1PC = Trastuzumab emtansine + pertuzumab + chemotherapy; T-DM1P = Trastuzumab emtansine + pertuzumab; PTC\_T-DM1P = pertuzumab + trastuzumab + chemotherapy followed by trastuzumab emtansine + pertuzumab; T-DM1 = Trastuzumab emtansine.

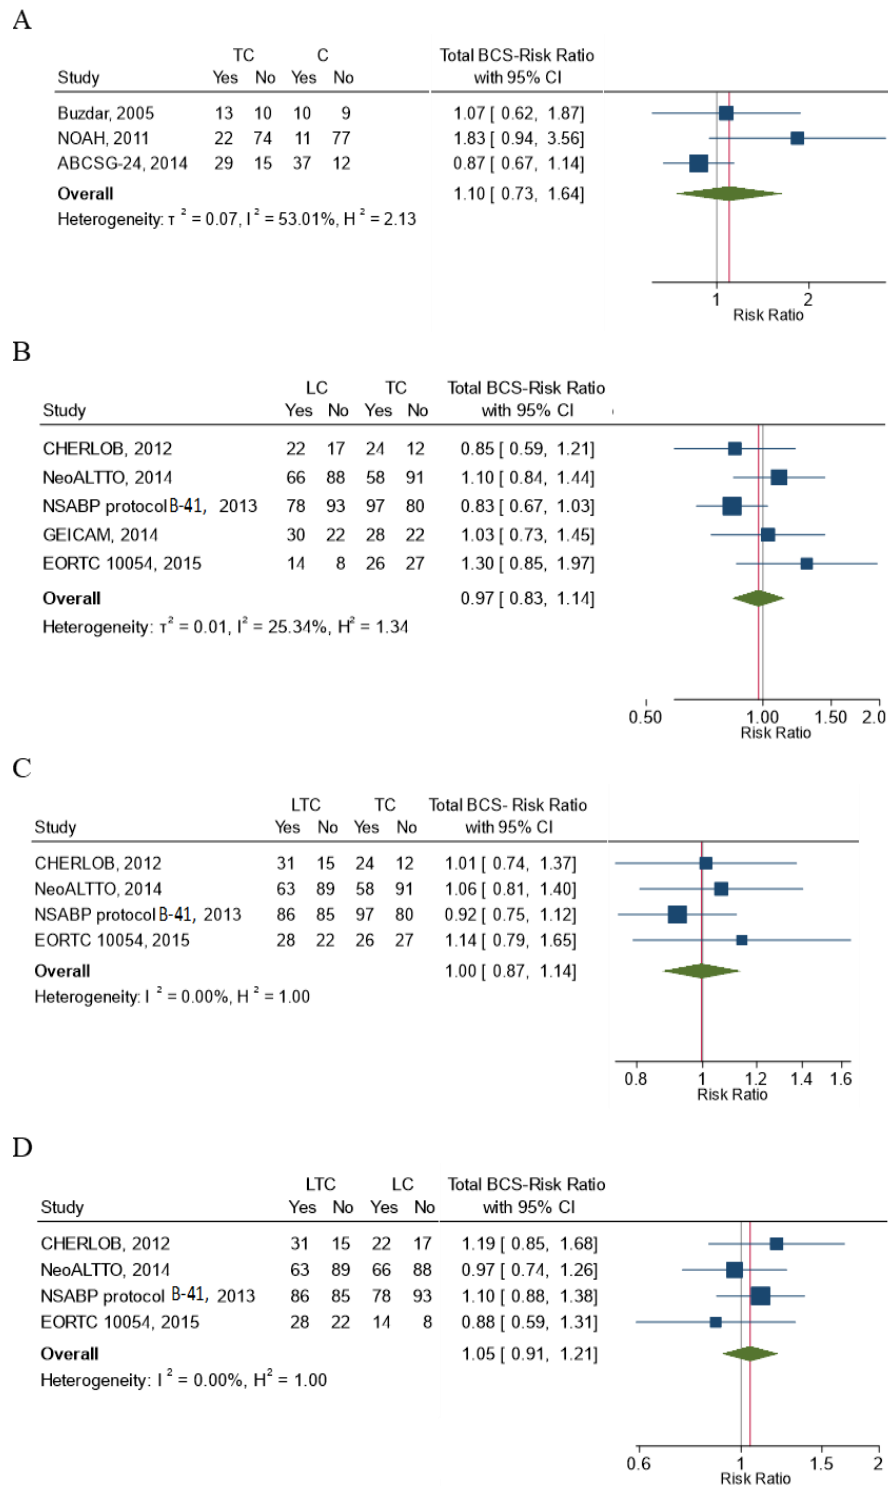

**Figure S12.** Forest plots of pairwise meta-analyses for total Breast Conservation Surgery. (A) TC vs C; (B) TC vs LC; (C) LTC vs TC; (D) LTC vs LC. C = Chemotherapy; TC = Trastuzumab + chemotherapy; LTC = Lapatinib + trastuzumab + chemotherapy; LC = Lapatinib + chemotherapy.

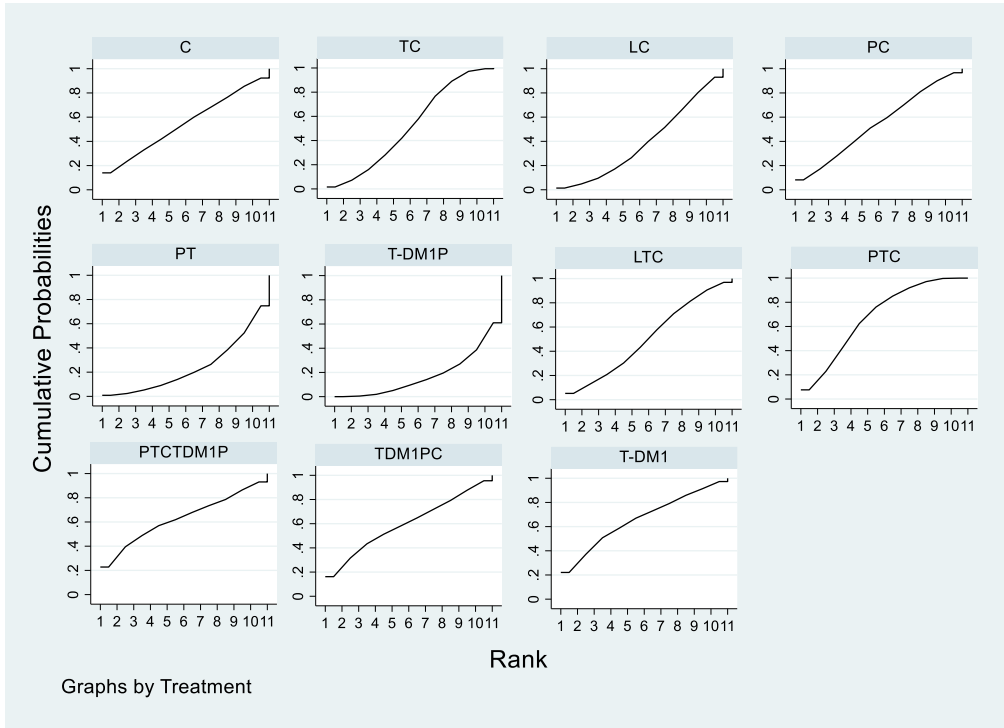

| Treatment  | SUCRA | PrBest | MeanRank |
|------------|-------|--------|----------|
| C          | 54.6  | 14     | 5.5      |
| TC         | 51.5  | 1.6    | 5.8      |
| PC         | 54.1  | 8.2    | 5.6      |
| LC         | 38.9  | 1.4    | 7.1      |
| PT         | 24.4  | 0.9    | 8.6      |
| T-DM1P     | 17.7  | 0      | 9.2      |
| PTC        | 68.5  | 7.6    | 4.1      |
| LTC        | 51    | 5.2    | 5.9      |
| T-DM1PC    | 60    | 16.2   | 5        |
| PTC_T-DM1P | 63    | 22.8   | 4.7      |
| T-DM1      | 66.2  | 22.1   | 4.4      |

**Figure S13.** Surface under the cumulative ranking curves (SUCRA) of total breast conservation surgery (BCS). C = Chemotherapy; TC = Trastuzumab + chemotherapy; PC = Pertuzumab + chemotherapy; LC = Lapatinib + chemotherapy; PTC = Pertuzumab + trastuzumab + chemotherapy; LTC = Lapatinib + trastuzumab + chemotherapy; PT = Pertuzumab + trastuzumab; T-DM1P = trastuzumab emtansine+ pertuzumab; T-DM1PC = trastuzumab emtansine + pertuzumab + chemotherapy; PTC\_T-DM1P = pertuzumab + trastuzumab + chemotherapy followed by trastuzumab emtansine + pertuzumab; T-DM1 = Trastuzumab emtansine.

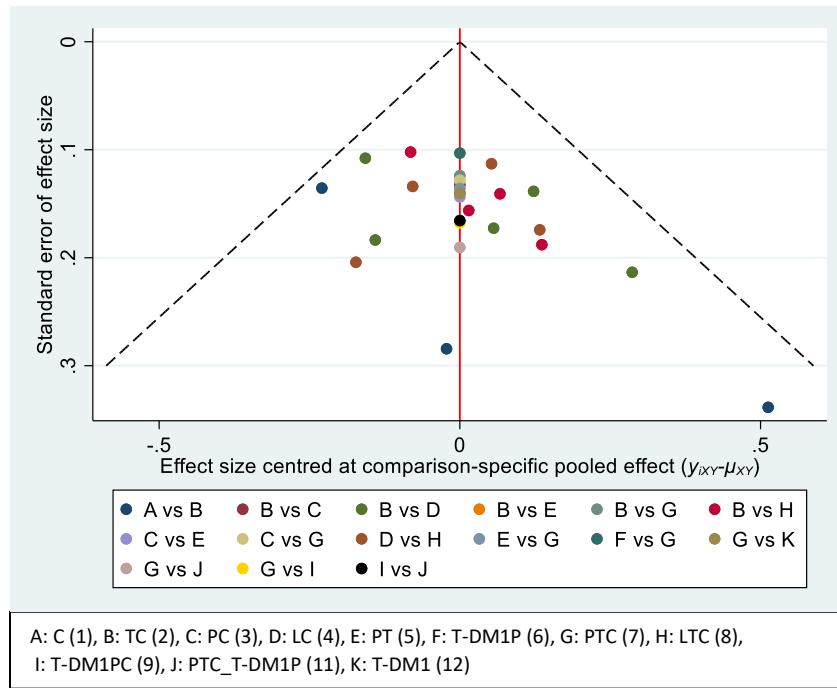

**Figure S14.** Comparison adjusted funnel plot of network meta-analysis for total Breast Conservation Surgery (BCS).

**Table S1.** Summary of studies and total number of patients included for each treatment regimen.

| No.                   | Treatment Regimen                                                                                                                                           | Regimen<br>Abbreviation | Number of<br>Trials | <i>n</i>    |
|-----------------------|-------------------------------------------------------------------------------------------------------------------------------------------------------------|-------------------------|---------------------|-------------|
| 1                     | Chemotherapy only ©                                                                                                                                         | C                       | 5                   | 259         |
| 2                     | Trastuzumab (T) + chemotherapy ©                                                                                                                            | TC                      | 16                  | 1439        |
| 3                     | Lapatinib (L) + chemotherapy ©                                                                                                                              | LC                      | 9                   | 884         |
| 4                     | Pertuzumab (P) + chemotherapy ©                                                                                                                             | PC                      | 1                   | 96          |
| 5                     | Pertuzumab (P) + Trastuzumab (T)                                                                                                                            | PT                      | 2                   | 199         |
| 6                     | Pertuzumab (P) + Trastuzumab (T) + chemotherapy ©                                                                                                           | PTC                     | 7                   | 755         |
| 7                     | Lapatinib (L) + Trastuzumab (T) + chemotherapy ©                                                                                                            | LTC                     | 7                   | 632         |
| 8                     | Trastuzumab emtansine (T-DM1) + Pertuzumab (P)                                                                                                              | T-DM1P                  | 1                   | 223         |
| 9                     | Trastuzumab emtansine (T-DM1) + Lapatinib (L) + chemotherapy ©                                                                                              | T-DM1LC                 | 1                   | 14          |
| 10                    | Trastuzumab emtansine (T-DM1) + Pertuzumab (P) followed by response<br>guided chemotherapy © or continued Trastuzumab emtansine (T-DM1) +<br>Pertuzumab (P) | T-DM1PC                 | 1                   | 101         |
| 11                    | Pertuzumab (P)+ Trastuzumab (T) + chemotherapy ( C ) followed by<br>Trastuzumab emtansine (T-DM1) + Pertuzumab ( P )                                        | PTC_T-DM1P              | 1                   | 52          |
| 12                    | Trastuzumab emtansine (T-DM1)                                                                                                                               | T-DM1                   | 1                   | 99          |
| <b>Total patients</b> |                                                                                                                                                             |                         |                     | <b>4753</b> |

**Table S2.** Details of study's interventions.

| Trial                    | Regimen | Anti-HER2 | Neoadjuvant Anti HER2 Treatment                                         |                      | Neoadjuvant Chemotherapy Regimen                                           |                                                                                                                                                                                                                              | Use of Taxane/<br>Anthracycline |
|--------------------------|---------|-----------|-------------------------------------------------------------------------|----------------------|----------------------------------------------------------------------------|------------------------------------------------------------------------------------------------------------------------------------------------------------------------------------------------------------------------------|---------------------------------|
|                          |         |           | Dosage                                                                  | Duration (Weeks)     | Chemotherapy                                                               | Dosage (Schedule) and Duration                                                                                                                                                                                               |                                 |
| Buzdar et al.<br>[29,30] | C       | -         | -                                                                       | -                    | Paclitaxel and FECp (F: Fluorouracil, E: Epirubicin, Cp: Cyclophosphamide) | Paclitaxel 225 mg/m <sup>2</sup> 3 weekly 4 cycles, FECp (F 500 mg/m <sup>2</sup> IV on days 1 and 4, Cp 500 mg/m <sup>2</sup> IV on day 1, E 75 mg/m <sup>2</sup> on day 1 only) 3 weekly 4 cycles                          | Taxane, Anthracycline           |
|                          | TC      | T         | T: 4 mg/kg IV loading dose then 2 mg/kg weekly                          | 24 weeks             | Paclitaxel and FECp                                                        | Same as above                                                                                                                                                                                                                | Taxane, Anthracycline           |
| CHERLOB                  | TC      | T         | T: 4 mg/kg IV loading dose then 2 mg/kg weekly                          | 26 weeks             | Paclitaxel and FECp                                                        | Paclitaxel 80 mg/m <sup>2</sup> weekly for 12 weeks then F 600 mg/m <sup>2</sup> , E 75 mg/m <sup>2</sup> , Cp 600 mg/m <sup>2</sup> 3 weekly 4 cycles                                                                       | Taxane, Anthracycline           |
|                          | LC      | L         | L: 1500 mg orally daily                                                 | 26 weeks             | Paclitaxel and FECp                                                        | Same as above                                                                                                                                                                                                                | Taxane, Anthracycline           |
|                          | LTC     | L, T      | T: 4 mg/kg IV loading dose then 2 mg/kg weekly, L: 1000 mg orally daily | 26 weeks             | Paclitaxel and FECp                                                        | Same as above                                                                                                                                                                                                                | Taxane, Anthracycline           |
| REMAGUS 02               | C       | -         | -                                                                       | -                    | Docetaxel and ECp                                                          | E 75 mg/m <sup>2</sup> , Cp 750 mg/m <sup>2</sup> 3 weekly 4 cycles then docetaxel (100 mg/m <sup>2</sup> ) 3 weekly 4 cycles                                                                                                | Taxane, Anthracycline           |
|                          | TC      | T         | T: 8 mg/kg IV loading dose then 6 mg/kg 3 weekly                        | 12 weeks 3 cycles    | Docetaxel and ECp                                                          | Same as above                                                                                                                                                                                                                | Taxane, Anthracycline           |
| Chang et al. [34]        | TC      | T         | T: 4 mg/kg IV loading dose then 2 mg/kg on Day 8, 15                    | 12 weeks 4 cycles    | Docetaxel and carboplatin                                                  | Docetaxel 75 mg/m <sup>2</sup> and carboplatin (AUC = 6) 3 weekly 4 cycles                                                                                                                                                   | Taxane                          |
|                          | C       | -         | -                                                                       | -                    | Docetaxel and carboplatin                                                  | Same as above                                                                                                                                                                                                                | Taxane                          |
| NOAH                     | TC      | T         | T: loading dose of 8 mg/ kg IV then 6 mg/kg 3 weekly                    | 30 weeks (10 cycles) | Paclitaxel, Doxorubicin, FCp, methotrexate                                 | Doxorubicin 60 mg/m <sup>2</sup> and paclitaxel 150 mg/m <sup>2</sup> 3 weekly 3 cycles, then paclitaxel 175 mg/m <sup>2</sup> 3 weekly 4 cycles. Cp 600 mg/m <sup>2</sup> , methotrexate (40 mg/m <sup>2</sup> ), and F 600 | Taxane, Anthracycline           |

| mg/m <sup>2</sup> ) on days 1 and 8 every 4 weeks 3 cycles. |     |      |                                                                                                     |                                         |                                |                                                                                                                                          |                       |
|-------------------------------------------------------------|-----|------|-----------------------------------------------------------------------------------------------------|-----------------------------------------|--------------------------------|------------------------------------------------------------------------------------------------------------------------------------------|-----------------------|
| C                                                           | -   | -    | Paclitaxel, Doxorubicin, FCp, Methotraxate                                                          | Same as above                           | Taxane, Anthracycline          |                                                                                                                                          |                       |
| NeoSphere                                                   | TC  | T    | T: 8 mg/kg IV loading dose, then 6 mg/kg 3 weekly.                                                  | 12 weeks (4 cycles)                     | Docetaxel                      | Docetaxel 75 mg/m <sup>2</sup> , escalating to 100 mg/m <sup>2</sup> (if tolerated) 3 weekly 4 cycles.                                   | Taxane                |
|                                                             | PTC | P, T | T: 8 mg/kg IV loading dose, then 6 mg/kg 3 weekly, P-loading dose 840 mg IV, then 420 mg 3 weekly.  | 12 weeks (4 cycles)                     | Docetaxel                      | Same as above                                                                                                                            | Taxane                |
|                                                             | PT  | P, T | T: 8 mg/kg IV loading dose, then 6 mg/kg 3 weekly, P: loading dose 840 mg IV, then 420 mg 3 weekly. | 12 weeks (4 cycles)                     | -                              | -                                                                                                                                        | -                     |
|                                                             | PC  | P    | P: loading dose 840 mg IV, then 420 mg 3 weekly.                                                    | 12 weeks (4 cycles)                     | Docetaxel                      | Docetaxel 75 mg/m <sup>2</sup> , escalating to 100 mg/m <sup>2</sup> (if tolerated) 3 weekly 4 cycles.                                   | Taxane                |
| GeparQuinto, GBG 44                                         | TC  | T    | T: loading dose of 8 mg/kg IV then 6 mg/kg 3 weekly.                                                | 24 weeks (8 cycles)                     | Docetaxel and ECp              | E 90 mg/m <sup>2</sup> , Cp 600 mg/m <sup>2</sup> 3 weekly 4 cycles, then docetaxel 100 mg/m <sup>2</sup> , 3 weekly 4 cycles.           | Taxane, Anthracycline |
|                                                             | LC  | L    | L: 1250 mg orally daily                                                                             | 24 weeks                                | Docetaxel and ECp              | Same as above                                                                                                                            | Taxane, Anthracycline |
| NeoALTTO                                                    | LC  | L    | L: 1500 mg orally daily                                                                             | 18 weeks (6 weeks then 12 weeks with C) | Paclitaxel                     | Paclitaxel 80 mg/m <sup>2</sup> weekly for 12 weeks.                                                                                     | Taxane                |
|                                                             | TC  | T    | T: 4 mg/kg loading dose IV then 2 mg/kg weekly                                                      | 18 weeks (6 weeks then 12 weeks with C) | Paclitaxel                     | Paclitaxel 80 mg/m <sup>2</sup> weekly for 12 weeks.                                                                                     | Taxane                |
|                                                             | LTC | L, T | L: 1000 mg orally daily, T - 4 mg/kg IV loading dose then 2 mg/kg weekly.                           | 18 weeks (6 weeks then 12 weeks with C) | Paclitaxel                     | Paclitaxel 80 mg/m <sup>2</sup> weekly 12 weeks.                                                                                         | Taxane                |
| NSABP protocol B-41                                         | TC  | T    | T: loading dose 4 mg/kg IV then 2 mg/kg weekly                                                      | 12 weeks                                | Paclitaxel and Doxorubicin, Cp | Doxorubicin 60 mg/m <sup>2</sup> and Cp-600 mg/m <sup>2</sup> 3 weekly 4 cycles, then paclitaxel 80 mg/m <sup>2</sup> 4 weekly 4 cycles. | Taxane, Anthracycline |



|                |     |      |                                                                                                                                       |                               |                                       |                                                                                                                                                    |                       |
|----------------|-----|------|---------------------------------------------------------------------------------------------------------------------------------------|-------------------------------|---------------------------------------|----------------------------------------------------------------------------------------------------------------------------------------------------|-----------------------|
|                | LC  | L    | L: 1500 mg (reduced to 1250 mg) orally daily                                                                                          | 12 weeks                      | Paclitaxel and Doxorubicin, Cp        | Doxorubicin 60 mg/m <sup>2</sup> and Cp 600 mg/m <sup>2</sup> 3 weekly 4 cycles, then paclitaxel 80 mg/m <sup>2</sup> 4 weekly 4 cycles            | Taxane, Anthracycline |
|                | LTC | L, T | T: loading dose 4 mg/kg then 2 mg/kg IV weekly, L: 1000 mg (reduced to 750 mg) orally daily                                           | 12 weeks                      | Paclitaxel and Doxorubicin, Cp        | Same as above                                                                                                                                      | Taxane, Anthracycline |
|                | TC  | T    | T: 4 mg/kg loading dose then 2 mg/kg IV weekly                                                                                        | 26 weeks (14 days prior to C) | Paclitaxel and FECp                   | F 500 mg/m <sup>2</sup> , E 75 mg/m <sup>2</sup> , Cp 500 mg/m <sup>2</sup> , 3 weekly 4 cycles, then paclitaxel 80 mg/m <sup>2</sup> for 12 weeks | Taxane, Anthracycline |
| LPT109096      | LC  | L    | L: 1500 mg daily orally, (reduced to 1250 mg due to diarrhea)                                                                         | 26 weeks (14 days prior to C) | Paclitaxel and FECp                   | F 500 mg/m <sup>2</sup> , E 75 mg/m <sup>2</sup> , Cp 500 mg/m <sup>2</sup> , 3 weekly 4 cycles, then paclitaxel 80 mg/m <sup>2</sup> for 12 weeks | Taxane, Anthracycline |
|                | LTC | L, T | T: 4 mg/kg IV loading dose then 2 mg/kg weekly, L: 1000 mg orally daily. (reduced to 750 mg with FECp, then 1000 mg with paclitaxel). | 26 weeks (14 days prior to C) | Paclitaxel and FECp                   | F 500 mg/m <sup>2</sup> , E 75 mg/m <sup>2</sup> , Cp 500 mg/m <sup>2</sup> , 3 weekly 4 cycles, then paclitaxel 80 mg/m <sup>2</sup> for 12 weeks | Taxane, Anthracycline |
| ABCSG-24       | C   | -    | -                                                                                                                                     | -                             | Docetaxel, Epirubicin +/- carboplatin | E 75 mg/m <sup>2</sup> , Docetaxel 75 mg/m <sup>2</sup> 3 weekly ± Carboplatin 1000 mg/m <sup>2</sup> orally, twice daily, days 1–13.              | Taxane, Anthracycline |
|                | TC  | T    | T: 8 mg/kg loading dose then 6 mg/kg IV, 3 weekly                                                                                     | 18 weeks (6 cycles)           | Docetaxel, Epirubicin +/- carboplatin | E 75 mg/m <sup>2</sup> , Docetaxel 75 mg/m <sup>2</sup> 3 weekly ± Carboplatin 1000 mg/m <sup>2</sup> orally, twice daily, days 1–13.              | Taxane, Anthracycline |
| GEICAM/2006-14 | TC  | T    | T: loading dose of 8 mg/kg then 6 mg/kg IV 3 weekly                                                                                   | 12 weeks (4 cycles)           | Docetaxel, epirubicin                 | E 90 mg/m <sup>2</sup> , Cp 600 mg/m <sup>2</sup> 3 weekly 4 cycles then docetaxel 100 mg/m <sup>2</sup> , 3 weekly 4 cycles                       | Taxane, Anthracycline |
|                | LC  | L    | L: 1250 mg orally daily                                                                                                               | 12 weeks                      | Docetaxel, epirubicin                 | E 90 mg/m <sup>2</sup> , Cp 600 mg/m <sup>2</sup> , 3 weekly 4 cycles then docetaxel 100 mg/m <sup>2</sup> , 3 weekly 4 cycles                     | Taxane, Anthracycline |
| EORTC 10054    | LC  | L    | L: 1000 mg orally daily                                                                                                               | 18 weeks                      | Docetaxel and FECp                    | Docetaxel 100 mg/m <sup>2</sup> 3 weekly 3 cycles then FECp (F 500 mg/m <sup>2</sup> , E                                                           | Taxane, Anthracycline |

|                                                                       |          |          |                                                                                                |                                          |                           |                                                                            |                       |
|-----------------------------------------------------------------------|----------|----------|------------------------------------------------------------------------------------------------|------------------------------------------|---------------------------|----------------------------------------------------------------------------|-----------------------|
| 100 mg/m <sup>2</sup> , Cp 500 mg/m <sup>2</sup> ), 3 weekly 3 cycles |          |          |                                                                                                |                                          |                           |                                                                            |                       |
|                                                                       | TC       | T        | T: 4 mg/kg loading dose then 2 mg/kg IV weekly                                                 | 18 weeks                                 | Docetaxel and FECp        | Same as above                                                              | Taxane, Anthracycline |
|                                                                       | LTC      | L, T     | T: 4 mg/kg loading dose then 2 mg/kg IV weekly, L: 1000 mg orally daily                        | 18 weeks                                 | Docetaxel and FECp        | Same as above                                                              | Taxane, Anthracycline |
| CALGB 40601                                                           | LTC      | L, T     | T: loading dose of 4 mg/kg IV then 2 mg/kg IV weekly, L: 1000 mg orally daily                  | 16 weeks                                 | Paclitaxel                | Paclitaxel 80 mg/m <sup>2</sup> weekly for 16 weeks                        | Taxane                |
|                                                                       | TC       | T        | T: loading dose of 4 mg/kg IV then 2 mg/kg weekly IV                                           | 16 weeks                                 | Paclitaxel                | Paclitaxel 80 mg/m <sup>2</sup> weekly for 16 weeks                        | Taxane                |
|                                                                       | LC       | L        | L: 1500 mg orally daily                                                                        | 16 weeks                                 | Paclitaxel                | Paclitaxel 80 mg/m <sup>2</sup> weekly for 16 weeks                        | Taxane                |
| WSG-ADAPT                                                             | PT       | P, T     | T: 8 mg/kg loading dose then 6 mg/kg, IV 3 weekly, P: loading dose 840 mg IV then by 420 mg    | 12 weeks (4 cycles)                      | -                         | -                                                                          |                       |
|                                                                       | PTC      | P, T     | T- 8 mg/kg IV loading dose then 6 mg/kg, P- loading dose 840 mg then 420 mg IV, 3 weekly       | 12 weeks (4 cycles)                      | Paclitaxel                | Paclitaxel 80 mg/m <sup>2</sup> every 3 weekly 12 weeks                    | Taxane                |
| KRISTINE                                                              | T-DM1 P  | T-DM1, P | T-DM1: 3-6 mg/kg IV, P: loading dose 840 mg then 420 mg IV 3 weekly                            | 18 weeks (6 cycles)                      | -                         | -                                                                          |                       |
|                                                                       | PTC      | P, T     | T: loading dose 8 mg/kg then 6 mg/kg IV, P: loading dose 840 mg given then 420 mg IV 3 weekly. | 18 weeks (6 cycles)                      | Docetaxel and carboplatin | Docetaxel 75 mg/m <sup>2</sup> , carboplatin [AUC] 6 mg, 3 weekly 6 cycles | Taxane                |
| Teal study                                                            | T-DM1 LC | T-DM1, L | T-DM1: 3.0 mg/kg IV, 3 weekly, L: 750 mg orally daily                                          | 18 weeks (6 weeks, then 12 weeks with C) | Paclitaxel                | Nab-paclitaxel 80 mg/m <sup>2</sup> weekly 12 weekly                       | Taxane                |

|                    |                |                   |                                                                                                                                                                                                           |                                                                                                      |                           |                                                                                                                                                                                                    |               |
|--------------------|----------------|-------------------|-----------------------------------------------------------------------------------------------------------------------------------------------------------------------------------------------------------|------------------------------------------------------------------------------------------------------|---------------------------|----------------------------------------------------------------------------------------------------------------------------------------------------------------------------------------------------|---------------|
| PEONY              | PTC            | P, T              | T: 4 mg/kg loading dose then 2 mg/kg IV weekly, P: 840 mg loading dose then 420 mg 3 IV weekly.                                                                                                           | 18 weeks (6 weeks, then 12 weeks with C)                                                             | Paclitaxel                | Paclitaxel 80 mg/m <sup>2</sup> weekly for 12 weeks then FECp (F 600 mg/m <sup>2</sup> , E-75 mg/m <sup>2</sup> , and Cp 600 mg/m <sup>2</sup> ), 3 weekly 4 cycles                                | Taxane        |
|                    | PTC            | P, T              | T: 8 mg/kg loading dose then 6 mg/kg IV, P: 840 mg loading dose then 420 mg 3 weekly IV                                                                                                                   | 12 weeks (4 cycles)                                                                                  | Docetaxel                 | Docetaxel 75 mg/m <sup>2</sup> , 3 weekly 12 weeks                                                                                                                                                 | Taxane        |
|                    | TC             | T                 | T: 8 mg/kg loading dose then 6 mg/kg IV, 3 weekly                                                                                                                                                         | 12 weeks (4 cycles)                                                                                  | Docetaxel                 | Same as above                                                                                                                                                                                      | Taxane        |
| Masuda et al. [11] | PTC            | P, T              | T: 8 mg/kg loading dose then 6 mg/kg IV, P: 840 mg loading dose then 420 mg IV.                                                                                                                           | 18 weeks (6 cycles)                                                                                  | Docetaxel                 | Docetaxel 75 mg/m <sup>2</sup> , Carboplatin AUC 6 mg 3 weekly 6 cycles                                                                                                                            | Taxane        |
|                    | PTC_<br>T-DM1P | P, T,<br>T-DM1, P | T: 8 mg/kg loading dose then 6 mg/kg IV, P: 840 mg loading dose then 420 mg IV 3 weekly (1–4 cycles), and P: 420 mg IV, T-DM1 3.6 mg/kg IV 3 weekly; 5–8 cycles                                           | 24 weeks (8 cycles)                                                                                  | Docetaxel                 | Docetaxel 75 mg/m <sup>2</sup> , Carboplatin AUC 6 mg 3 weekly 1–4 cycles                                                                                                                          | Taxane        |
|                    | T-DM1 PC       | T-DM1, P          | P: loading dose 840 mg then 420 mg IV, T-DM1: 3.6 mg/kg IV 3 weekly (1–4 cycles), For Responders continued T-DM1P (5–6 cycles) (response—reduction of tumour size in MRI/ reduced Ki67 level at 4 cycles) | 12 weeks (4 cycles) then another 2 cycles (6 weeks) if response or C for another 12 weeks (4 cycles) | FECp                      | For non-responders: FECp F 500 mg/m <sup>2</sup> ; E 100 mg/m <sup>2</sup> ; Cp 500 mg/m <sup>2</sup> (Dose reduction of E, 75 or 60 mg/m <sup>2</sup> or discontinued, if AE) 3 weekly 5–8 cycles | Anthracycline |
| TRIO-US B07        | TC             | T                 | T: Run in cycle 8 mg/kg IV (cycle 1), followed by 6 mg/kg (6 cycles)                                                                                                                                      | 21 weeks (loading + 3 weekly 6 cycles with C) (7 cycles)                                             | Docetaxel and carboplatin | Docetaxel 75 mg/m <sup>2</sup> , Carboplatin AUC 6 mg 3 weekly 6 cycles                                                                                                                            | Taxane        |

|                         |       |      |                                                                                                                                                                  |                                                                                               |                           |                                                                                |        |
|-------------------------|-------|------|------------------------------------------------------------------------------------------------------------------------------------------------------------------|-----------------------------------------------------------------------------------------------|---------------------------|--------------------------------------------------------------------------------|--------|
| Hatschek et al.<br>[54] | LC    | L    | L: Run in cycle 1000 mg daily orally for 21 days, followed by 1000 mg/day orally daily                                                                           | 21 weeks (loading 21 days + daily 18 weeks with C)                                            | Docetaxel and carboplatin | Docetaxel 75 mg/m <sup>2</sup> , Carboplatin AUC 6 mg 3 weekly 6 cycles        | Taxane |
|                         | LTC   | L, T | T: Run in cycle 8 mg/kg IV once and followed by 6 mg/kg 6 cycles;<br>L: Run in cycle 1000 mg daily orally for 21 days, followed by 1000 mg orally daily 18 weeks | 21 weeks (loading 1 cycle + 3 weekly 6 cycles with C) (7 cycles)                              | Docetaxel and carboplatin | Docetaxel 75 mg/m <sup>2</sup> , Carboplatin AUC 6 mg 3 weekly 6 cycles        | Taxane |
|                         | PTC   | P, T | T: Subcutaneous 600 mg; P: loading dose 840 mg then 420 mg 3 weekly                                                                                              | 18 weeks (6 cycles) if no response/toxicity after 2 cycles switched to T-DM1 regimen 4 cycles | Docetaxel                 | Docetaxel 75 mg/m <sup>2</sup> first dose, then 100 mg/m <sup>2</sup> 3 weekly | Taxane |
|                         | T-DM1 | -    | T-DM1 (3.6 mg/kg) 3 weekly                                                                                                                                       | 18 weeks (6 cycles) If no response/toxicity after 2 cycles switched to PTC regimen 4 cycles   | -                         | -                                                                              | -      |

C = Chemotherapy; TC, Trastuzumab + chemotherapy; PC = Pertuzumab + chemotherapy; LC = Lapatinib + chemotherapy; PTC = Pertuzumab + trastuzumab + chemotherapy; LTC = Lapatinib + trastuzumab + chemotherapy; PT = Pertuzumab + trastuzumab; T-DM1P = T-DM1+ pertuzumab; T-DM1LC = T-DM1 + lapatinib + chemotherapy; T-DM1PC = T-DM1 + Pertuzumab followed by response chemotherapy or guided continued T-DM1 + pertuzumab; PTC\_T-DM1P = Pertuzumab + Trastuzumab + chemotherapy followed by T-DM1 + Pertuzumab; T-DM1 = trastuzumab emtansine; T = Trastuzumab; P = Pertuzumab; L = Lapatinib; F = Fluorouracil; E = Epirubicin; Cp = Cyclophosphamide; IV- Intravenous; AUC = area under the plasma concentration-time curve.

**Table S3.** Results of risk of bias assessment.

| Reference             | Regimens        | Outcome | Randomization Process | Deviations from Intended Interventions | Missing Outcome Data | Measurement of the Outcome | Selection of the Reported Result | Overall Bias  |
|-----------------------|-----------------|---------|-----------------------|----------------------------------------|----------------------|----------------------------|----------------------------------|---------------|
| Buzdar et al. [29,30] | TC, C           | pCR     | Low                   | Low                                    | Low                  | Low                        | Low                              | Low           |
|                       |                 | SAE     | Low                   | Low                                    | High                 | Low                        | Some concerns                    | High          |
|                       |                 | BCS     | Low                   | Low                                    | Low                  | Low                        | Low                              | Low           |
| CHERLOB               | TC, LC, LTC     | pCR     | Low                   | Some concerns                          | Low                  | Low                        | Low                              | Some concerns |
|                       |                 | SAE     | Low                   | Some concerns                          | Low                  | Low                        | Some concerns                    | Some concerns |
|                       |                 | BCS     | Low                   | Some concerns                          | Low                  | Low                        | Low                              | Some concerns |
|                       |                 | DFS     | Low                   | Some concerns                          | Some concerns        | Low                        | Low                              | Some concerns |
|                       |                 |         |                       |                                        |                      |                            |                                  |               |
| RAMAGUS 02            | C, TC           | pCR     | Low                   | Low                                    | Low                  | Low                        | Low                              | Low           |
|                       |                 | SAE     | Low                   | Low                                    | Low                  | Low                        | Low                              | Low           |
| Chang et al. [34]     | C, TC           | pCR     | Some concerns         | Low                                    | Some concerns        | Some concerns              | Low                              | Some concerns |
|                       |                 | SAE     | Some concerns         | Low                                    | Some concerns        | Some concerns              | Low                              | Some concerns |
| NOAH                  | C, TC           | pCR     | Low                   | Low                                    | Low                  | Low                        | Low                              | Low           |
|                       |                 | SAE     | Low                   | Low                                    | Low                  | Low                        | Some concerns                    | Some concerns |
|                       |                 | BCS     | Low                   | Low                                    | Low                  | Low                        | Low                              | Low           |
|                       |                 | DFS     | Low                   | Low                                    | Low                  | Low                        | Low                              | Low           |
|                       |                 |         |                       |                                        |                      |                            |                                  |               |
| NeoSphere             | TC, PT, PTC, PC | pCR     | Low                   | Low                                    | Low                  | Low                        | Low                              | Low           |
|                       |                 | SAE     | Low                   | Low                                    | Low                  | Low                        | Some concerns                    | Low           |
|                       |                 | BCS     | Low                   | Low                                    | Some concerns        | Low                        | Low                              | Some concerns |
|                       |                 | DFS     | Low                   | Low                                    | Low                  | Low                        | Low                              | Low           |
| GeparQuinto           | TC, LC          | pCR     | Low                   | Low                                    | Low                  | Low                        | Low                              | Low           |
|                       |                 | SAE     | Low                   | Low                                    | Low                  | Low                        | Some concerns                    | Low           |

|  |  |     |               |               |               |     |               |               |
|--|--|-----|---------------|---------------|---------------|-----|---------------|---------------|
|  |  | DFS | Low           | Low           | Low           | Low | Low           | Low           |
|  |  | pCR | Low           | Low           | Some concerns | Low | Low           | Some concerns |
|  |  | SAE | Low           | Low           | Some concerns | Low | Some concerns | Some concerns |
|  |  | BCS | Low           | Low           | Low           | Low | Low           | Low           |
|  |  | DFS | Low           | Low           | Some concerns | Low | Low           | Some concerns |
|  |  | pCR | Low           | Low           | Low           | Low | Low           | Low           |
|  |  | SAE | Low           | Low           | Some concerns | Low | Low           | Some concerns |
|  |  | BCS | Low           | Low           | Low           | Low | Low           | Low           |
|  |  | pCR | Some concerns | Low           | Some concerns | Low | Low           | Some concerns |
|  |  | SAE | Some concerns | Low           | Some concerns | Low | Low           | Some concerns |
|  |  | pCR | Low           | Low           | Low           | Low | Low           | Low           |
|  |  | SAE | Low           | Low           | Low           | Low | Low           | Low           |
|  |  | BCS | Low           | Low           | Low           | Low | Low           | Low           |
|  |  | pCR | Low           | Low           | Low           | Low | Low           | Low           |
|  |  | SAE | Low           | Low           | Low           | Low | Low           | Low           |
|  |  | BCS | Low           | Low           | Low           | Low | Low           | Low           |
|  |  | pCR | Low           | Some concerns | Some concerns | Low | Low           | Some concerns |
|  |  | SAE | Low           | Some concerns | Some concerns | Low | Some concerns | Some concerns |
|  |  | BCS | Low           | Some concerns | Low           | Low | Low           | Some concerns |
|  |  | pCR | Low           | Low           | Low           | Low | Low           | Low           |
|  |  | SAE | Low           | Low           | Low           | Low | Low           | Low           |
|  |  | BCS | Low           | Low           | Low           | Low | Low           | Low           |
|  |  | pCR | Low           | Low           | Low           | Low | Low           | Low           |
|  |  | SAE | Low           | Low           | Low           | Low | Low           | Low           |
|  |  | BCS | Low           | Low           | Low           | Low | Low           | Low           |
|  |  | pCR | Low           | Some concerns | Some concerns | Low | Low           | Some concerns |
|  |  | SAE | Low           | Some concerns | Some concerns | Low | Some concerns | Some concerns |
|  |  | BCS | Low           | Some concerns | Low           | Low | Low           | Some concerns |
|  |  | pCR | Low           | Low           | Low           | Low | Low           | Low           |
|  |  | SAE | Low           | Low           | Some concerns | Low | Low           | Some concerns |
|  |  | pCR | Some concerns | Low           | Some concerns | Low | Low           | Some concerns |
|  |  | SAE | Some concerns | Low           | Some concerns | Low | High          | Some concerns |
|  |  | BCS | Some concerns | Low           | Low           | Low | Low           | Some concerns |

|                      |                          |     |     |               |               |     |               |               |
|----------------------|--------------------------|-----|-----|---------------|---------------|-----|---------------|---------------|
| KRISTINE             | PTC, T-DM1P              | pCR | Low | Low           | Low           | Low | Low           | Low           |
|                      |                          | SAE | Low | Low           | Some concerns | Low | Low           | Some concerns |
|                      |                          | BCS | Low | Low           | Low           | Low | Low           | Low           |
|                      |                          | DFS | Low | Low           | Low           | Low | Low           | Low           |
| Teal study           | PTC, T-DM1LC             | pCR | Low | Low           | Low           | Low | Low           | Low           |
|                      |                          | SAE | Low | Low           | Low           | Low | Some concerns | Low           |
| PEONY                | TC, PTC                  | pCR | Low | Low           | Low           | Low | Low           | Low           |
|                      |                          | SAE | Low | Low           | Low           | Low | Low           | Low           |
| Masuda et al. [11]   | PTC, PTC_T-DM1P, T-DM1PC | pCR | Low | Low           | Low           | Low | Low           | Low           |
|                      |                          | SAE | Low | Low           | Low           | Low | Low           | Low           |
|                      |                          | BCS | Low | Low           | Low           | Low | Low           | Low           |
| TRIO-US              | TC, LC, LTC              | pCR | Low | Some concerns | Low           | Low | Low           | Some concerns |
|                      |                          | SAE | Low | Some concerns | Some concerns | Low | Low           | Some concerns |
| Hatschek et al. [54] | PTC, T-DM1               | pCR | Low | Some concerns | Low           | Low | Low           | Some concerns |
|                      |                          | SAE | Low | Some concerns | Low           | Low | Low           | Some concerns |
|                      |                          | BCS | Low | Low           | Low           | Low | Low           | Low           |
|                      |                          | DFS | Low | Some concerns | Low           | Low | Low           | Some concerns |

C = Chemotherapy; TC = Trastuzumab + chemotherapy, PC = Pertuzumab + chemotherapy; LC = Lapatinib + chemotherapy; PTC = Pertuzumab + trastuzumab + chemotherapy; LTC = Lapatinib + trastuzumab + chemotherapy; PT = Pertuzumab + trastuzumab; T-DM1P = trastuzumab emtansine + pertuzumab; T-DM1LC = trastuzumab emtansine + lapatinib + chemotherapy; T-DM1PC = trastuzumab emtansine + pertuzumab + chemotherapy; PTC\_T-DM1P = pertuzumab + trastuzumab + chemotherapy followed by trastuzumab emtansine + pertuzumab, T-DM1= Trastuzumab emtansine.

**Table S4.** Results of meta regression of LTC vs LC and LC vs TC for pathologic complete response (pCR) outcome.

| <b>(A) LTC vs LC</b>              |                         |                          |                        |
|-----------------------------------|-------------------------|--------------------------|------------------------|
| <b>Co-variables</b>               | <b>Number of trials</b> | <b>I<sup>2</sup> (%)</b> | <b>Tau<sup>2</sup></b> |
| Null model                        | 7                       | 42.12                    | 0.0339                 |
| Duration of anti HER2 treatment   | 7                       | 34.95                    | 0.03033                |
| Chemotherapy regimen type         | 7                       | 0.00                     | 0                      |
| Median age                        | 6                       | 0.00                     | 0                      |
| HR negative percentage (%HR-ve)   | 7                       | 40.84                    | 0.03751                |
| Nodal positive percentage         | 3                       | 0.00                     | 0                      |
| T3-T4 tumours percentage (%T3-T4) | 4                       | 41.85                    | 0.03902                |
| <b>(B) LC vs TC</b>               |                         |                          |                        |
| <b>Co-variables</b>               | <b>Number of trials</b> | <b>I<sup>2</sup> (%)</b> | <b>Tau<sup>2</sup></b> |
| Null model                        | 9                       | 25.96                    | 0.01439                |
| Duration of anti HER2 treatment   | 9                       | 22.01                    | 0.01545                |
| Chemotherapy regimen type         | 9                       | 24.30                    | 0.01348                |
| Median age                        | 8                       | 0.00                     | 0                      |
| HR negative percentage (%HR-ve)   | 8                       | 23.62                    | 0.01254                |
| Nodal positive percentage         | 5                       | 0.00                     | 0                      |
| T3-T4 tumours percentage (%T3-T4) | 6                       | 0.00                     | 0                      |

C = Chemotherapy; TC = Trastuzumab + chemotherapy; LTC = Lapatinib + trastuzumab + chemotherapy; LC = Lapatinib + chemotherapy.



**Table S5.** Subgroup analyses of LTC vs LC for pathological complete response (pCR) outcome.

| Subgroup                      | No. of Trials | pCR-RR (95% CI)          | I <sup>2</sup> | Tau <sup>2</sup> |
|-------------------------------|---------------|--------------------------|----------------|------------------|
| Duration of anti HER2 therapy |               |                          |                |                  |
| 18 weeks or less              | 4             | 1.68 (95% CI: 1.21–2.33) | 66.67          | 0.070            |
| More than 18 weeks            | 3             | 1.67 (95% CI: 1.33–2.07) | 0.00           | 0.000            |
| HR-ve Percentage (%HR-ve)     |               |                          |                |                  |
| <45%HR-ve                     | 4             | 1.58 (95% CI: 1.21–2.08) | 38.89          | 0.030            |
| >45%HR-ve                     | 3             | 1.77 (95% CI: 1.24–2.53) | 35.94          | 0.036            |
| Chemotherapy type             |               |                          |                |                  |
| Taxane                        | 3             | 2.13 (95% CI: 1.65–2.75) | 0.00           | 0.000            |
| Taxane + Anthracycline        | 4             | 1.33 (95% CI: 1.12–1.58) | 0.00           | 0.000            |
| Overall                       | 7             | 1.66 (95% CI: 1.33–2.07) | 42.12          | 0.034            |

RR = Risk ratio; LTC = Lapatinib + trastuzumab +chemotherapy; LC = Lapatinib + chemotherapy.

**Table S6.** Subgroup analyses of LC vs TC for pathological complete response (pCR) outcome.

| Subgroup                      | No. of trials | pCR-RR (95% CI)           | I <sup>2</sup> | Tau <sup>2</sup> |
|-------------------------------|---------------|---------------------------|----------------|------------------|
| Duration of anti HER2 therapy |               |                           |                |                  |
| 18 weeks or less              | 5             | 0.74 (95% CI: 0.57–0.95)  | 43.85%         | 0.035            |
| More than 18 weeks            | 4             | 0.70 (95% CI: 0.58–0.84)  | 0%             | 0.000            |
| HR-ve Percentage (%HR-ve)     |               |                           |                |                  |
| <45%HR-ve                     | 6             | 0.75 (95% CI: 0.61–0.92)  | 40.59%         | 0.024            |
| >45%HR-ve                     | 3             | 0.70 (95%CI: 0.52–0.94)   | 0.79%          | 0.001            |
| Chemotherapy type             |               |                           |                |                  |
| Taxane                        | 3             | 0.65 (95% CI: 0.49–0.85)  | 0%             | 0.000            |
| Taxane + Anthracycline        | 6             | 0.78 (95% CI: 0.63–0.97)  | 41.68%         | 0.026            |
| Overall                       | 9             | 0.74 (95%CI: 0.63–0.87)   | 25.96%         | 0.014            |
| Median age                    |               |                           |                |                  |
| 50 years or more              | 4             | 0.69 (95% CI: 0.59–0.82)  | 0%             | 0.000            |
| <50 years                     | 4             | 0.63 (95% CI: 0.45–0.87)  | 0%             | 0.000            |
| Overall                       | 8             | 0.68 (95% CI:0.58 - 0.79) | 0%             | 0.000            |
| T3-T4 percentage (%T3-T4)     |               |                           |                |                  |
| <40% T3–4                     | 2             | 0.65 (95%CI: 0.54–0.80)   | 0%             | 0.000            |
| >40% T3–4                     | 4             | 0.89 (95% CI: 0.74–1.06)  | 0%             | 0.000            |
| Overall                       | 6             | 0.76 (95% CI: 0.63–0.92)  | 39.19%         | 0.02             |
| Nodal positivity (%)          |               |                           |                |                  |
| 65% or more                   | 3             | 0.66 (95% CI: 0.54–0.79)  | 0%             | 0.000            |
| <65%                          | 2             | 0.96 (95% CI: 0.78–1.18)  | 0%             | 0.000            |
| Overall                       | 5             | 0.76 (95% CI: 0.60–0.96)  | 50.71%         | 0.032            |

RR = Risk ratio; LTC = Lapatinib + trastuzumab +chemotherapy; TC = Trastuzumab + chemotherapy.

**Table S7.** Treatment comparisons and data used for pooling pathological complete response (pCR) outcome in network meta-analysis.

| Trial                 | Year | Regimen    | Total Number | Number achieving pCR |
|-----------------------|------|------------|--------------|----------------------|
| Buzdar et al. [29,30] | 2005 | C          | 19           | 5                    |
|                       |      | TC         | 23           | 15                   |
| CHERLOB               | 2012 | TC         | 36           | 9                    |
|                       |      | LC         | 39           | 10                   |
|                       |      | LTC        | 46           | 21                   |
| REMAGUS 02            | 2017 | C          | 58           | 11                   |
|                       |      | TC         | 62           | 16                   |
| Chang et al. [34]     | 2010 | TC         | 15           | 6                    |
|                       |      | C          | 15           | 1                    |
| NOAH                  | 2011 | TC         | 117          | 45                   |
|                       |      | C          | 118          | 23                   |
| NeoSphere             | 2012 | TC         | 107          | 23                   |
|                       |      | PTC        | 107          | 42                   |
|                       |      | PT         | 107          | 12                   |
|                       |      | PC         | 96           | 17                   |
| GeparQuinto           | 2012 | TC         | 307          | 137                  |
|                       |      | LC         | 308          | 93                   |
| NeoALTTO              | 2012 | LC         | 154          | 30                   |
|                       |      | TC         | 149          | 40                   |
|                       |      | LTC        | 152          | 68                   |
| NSABP protocol B-41   | 2013 | TC         | 181          | 87                   |
|                       |      | LC         | 174          | 81                   |
|                       |      | LTC        | 174          | 103                  |
| LPT109096             | 2013 | TC         | 33           | 14                   |
|                       |      | LC         | 34           | 13                   |
|                       |      | LTC        | 33           | 17                   |
| ABCSG-24              | 2014 | C          | 49           | 13                   |
|                       |      | TC         | 44           | 17                   |
| GEICAM                | 2014 | TC         | 50           | 23                   |
|                       |      | LC         | 52           | 12                   |
| EORTC 10054           | 2015 | LC         | 23           | 8                    |
|                       |      | TC         | 53           | 27                   |
|                       |      | LTC        | 52           | 27                   |
| CALGB 40601           | 2016 | LTC        | 117          | 60                   |
|                       |      | TC         | 118          | 51                   |
|                       |      | LC         | 64           | 17                   |
| WSG-ADAPT             | 2017 | PT         | 92           | 31                   |
|                       |      | PTC        | 42           | 38                   |
| KRISTINE              | 2018 | T-DM1P     | 223          | 99                   |
|                       |      | PTC        | 221          | 123                  |
| Teal                  | 2019 | T-DM1LC    | 14           | 12                   |
|                       |      | PTC        | 16           | 10                   |
| PEONY                 | 2019 | PTC        | 219          | 86                   |
|                       |      | TC         | 110          | 24                   |
| Masuda et al. [11]    | 2020 | PTC        | 51           | 29                   |
|                       |      | PTC_T-DM1P | 52           | 37                   |
|                       |      | T-DM1PC    | 101          | 58                   |
| TRIO-US B07           | 2020 | TC         | 34           | 16                   |
|                       |      | LC         | 36           | 9                    |
|                       |      | LTC        | 58           | 30                   |
| Hatschek et al. [54]  | 2021 | PTC        | 99           | 45                   |
|                       |      | T-DM1      | 99           | 43                   |

C = Chemotherapy; TC = Trastuzumab + chemotherapy, PC = Pertuzumab + chemotherapy; LC = Lapatinib + chemotherapy; PTC = Pertuzumab + trastuzumab + chemotherapy; LTC = Lapatinib + trastuzumab

+chemotherapy; PT = Pertuzumab + trastuzumab; T-DM1P = trastuzumab emtansine + pertuzumab; T-DM1LC = trastuzumab emtansine +lapatinib + chemotherapy; T-DM1PC = trastuzumab emtansine + pertuzumab followed by response guided chemotherapy or continued trastuzumab emtansine + Pertuzumab; PTC\_T-DM1P = pertuzumab + trastuzumab + chemotherapy followed by trastuzumab emtansine + pertuzumab; T-DM1 = Trastuzumab emtansine.

**Table S8.** Results of meta regression of LC vs TC and LTC vs TC comparisons for serious adverse events (SAE) outcome.

| <b>(A) LC vs TC</b>               |                         |                          |                        |
|-----------------------------------|-------------------------|--------------------------|------------------------|
| <b>Co-variables</b>               | <b>Number of trials</b> | <b>I<sup>2</sup> (%)</b> | <b>Tau<sup>2</sup></b> |
| Null model                        | 9                       | 79.97                    | 0.1034                 |
| Duration of anti HER2 treatment   | 9                       | 75.82                    | 0.1433                 |
| Chemotherapy regimen type         | 9                       | 62.33                    | 0.0394                 |
| Median age                        | 8                       | 82.06                    | 0.2116                 |
| HR negative percentage (%HR-ve)   | 8                       | 84.20                    | 0.1440                 |
| T3-T4 tumours percentage (%T3-T4) | 6                       | 62.84                    | 0.0618                 |
| <b>(B) LTC vs TC</b>              |                         |                          |                        |
| <b>Co-variables</b>               | <b>Number of trials</b> | <b>I<sup>2</sup> (%)</b> | <b>Tau<sup>2</sup></b> |
| Null model                        | 7                       | 73.78                    | 0.1512                 |
| Duration of anti HER2 treatment   | 7                       | 78.08                    | 0.3457                 |
| Chemotherapy regimen type         | 7                       | 36.71                    | 0.0294                 |
| Median age                        | 6                       | 81.11                    | 0.6528                 |
| HR negative percentage (%HR-ve)   | 7                       | 78.01                    | 0.3386                 |
| T3-T4 tumours percentage (%T3-T4) | 4                       | 70.92                    | 0.1065                 |

C = Chemotherapy; TC = Trastuzumab + chemotherapy; LTC = Lapatinib + trastuzumab +chemotherapy; LC = Lapatinib + chemotherapy.

**Table S9.** Treatment comparisons and data used for pooling Serious adverse events (SAE) outcome in network meta-analysis.

| Trial                 | Year | Regimen    | Total Number | Number with SAE |
|-----------------------|------|------------|--------------|-----------------|
| Buzdar et al. [29,30] | 2005 | C          | 19           | 11              |
|                       |      | TC         | 23           | 21              |
| CHERLOB               | 2012 | TC         | 36           | 2               |
|                       |      | LC         | 39           | 14              |
|                       |      | LTC        | 46           | 16              |
| REMAGUS 02            | 2017 | C          | 58           | 38              |
|                       |      | TC         | 62           | 37              |
| Chang et al. [34]     | 2010 | TC         | 15           | 6               |
|                       |      | C          | 15           | 4               |
| NOAH                  | 2011 | TC         | 117          | 3               |
|                       |      | C          | 118          | 5               |
| NeoSphere             | 2012 | TC         | 107          | 61              |
|                       |      | PTC        | 107          | 48              |
|                       |      | PT         | 107          | 4               |
|                       |      | PC         | 96           | 52              |
| GeparQuinto           | 2012 | TC         | 307          | 237             |
|                       |      | LC         | 308          | 222             |
| NeoALTTO              | 2012 | LC         | 154          | 36              |
|                       |      | TC         | 149          | 11              |
|                       |      | LTC        | 152          | 32              |
| NSABP protocol B-41   | 2013 | TC         | 181          | 89              |
|                       |      | LC         | 174          | 107             |
|                       |      | LTC        | 174          | 104             |
| LPT109096             | 2013 | TC         | 33           | 22              |
|                       |      | LC         | 34           | 23              |
|                       |      | LTC        | 33           | 25              |
| ABCSG-24              | 2014 | C          | 49           | 25              |
|                       |      | TC         | 44           | 21              |
| GEICAM                | 2014 | TC         | 50           | 21              |
|                       |      | LC         | 52           | 28              |
| EORTC 10054           | 2015 | LC         | 23           | 10              |
|                       |      | TC         | 53           | 22              |
|                       |      | LTC        | 52           | 23              |
| CALGB 40601           | 2016 | LTC        | 117          | 25              |
|                       |      | TC         | 118          | 4               |
|                       |      | LC         | 64           | 14              |
| WSG-ADAPT             | 2017 | PT         | 92           | 5               |
|                       |      | PTC        | 42           | 5               |
| KRISTINE              | 2018 | T-DM1P     | 223          | 29              |
|                       |      | PTC        | 221          | 141             |
| Teal                  | 2019 | T-DM1LC    | 14           | 2               |
|                       |      | PTC        | 16           | 1               |
| PEONY                 | 2019 | PTC        | 219          | 106             |
|                       |      | TC         | 110          | 46              |
| Masuda et al. [11]    | 2020 | PTC        | 51           | 43              |
|                       |      | PTC_T-DM1P | 52           | 40              |
|                       |      | T-DM1PC    | 101          | 43              |
| TRIO-US B07           | 2020 | TC         | 34           | 4               |
|                       |      | LC         | 36           | 7               |
|                       |      | LTC        | 58           | 16              |
| Hatschek et al. [54]  | 2021 | PTC        | 99           | 7               |
|                       |      | T-DM1      | 99           | 12              |

C = Chemotherapy; TC = Trastuzumab + chemotherapy, PC = Pertuzumab + chemotherapy; LC = Lapatinib + chemotherapy; PTC = Pertuzumab + trastuzumab + chemotherapy; LTC = Lapatinib + trastuzumab

+chemotherapy; PT = Pertuzumab + trastuzumab; T-DM1P = trastuzumab emtansine + pertuzumab; T-DM1LC = trastuzumab emtansine +lapatinib + chemotherapy; T-DM1PC = trastuzumab emtansine + pertuzumab followed by response guided chemotherapy or continued trastuzumab emtansine + Pertuzumab; PTC\_T-DM1P = pertuzumab + trastuzumab + chemotherapy followed by trastuzumab emtansine + pertuzumab.

**Table S10.** Comparison of study characteristics in treatment loop with inconsistency for serious adverse events (SAE) outcome.

| Trial                                 | Regimen | Chemotherapy Type   | Duration of Treatment (Weeks) | Median Age (Years) | Tumour Size                |                               | % HR Positive | % HR Negative | % Node Negative (N0) | % Node Positive | ECOG Performance Status $\leq 1$ (%) |
|---------------------------------------|---------|---------------------|-------------------------------|--------------------|----------------------------|-------------------------------|---------------|---------------|----------------------|-----------------|--------------------------------------|
|                                       |         |                     |                               |                    | Median Size of Tumour (mm) | T Stage (%)                   |               |               |                      |                 |                                      |
| NeoSphere (Gianni, et al., 2012) [38] | TC      | Taxane (Docetaxel)  | 12                            | 50                 | 50 (20–200)                | T2–3, T4a–c (94%), T4d (7%)   | 47            | 53            | 30                   | 70              | 100                                  |
|                                       | PTC     | Taxane (Docetaxel)  |                               | 50                 | 55 (20–150)                | T2–3, T4a–c (91%), T4d (9%)   | 47            | 53            | 29                   | 71              | 100                                  |
|                                       | PT      | -                   |                               | 49                 | 50 (20–200)                | T2–3, T4a–c (94%), T4d (7%)   | 48            | 52            | 30                   | 70              | 100                                  |
|                                       | PC      | Taxane (Docetaxel)  |                               | 49                 | 50 (0–180)                 | T2–3, T4a–c (95%), T4d (5%)   | 48            | 52            | 29                   | 71              | 100                                  |
| WSG-ADAPT (Nitz et al., 2017) [49]    | PT      | -                   | 12                            | 54                 | -                          | T1 (41%), T2–3 (58%), T4 (1%) | 0             | 100           | 54.4                 | 45.6            | 100                                  |
|                                       | PTC     | Taxane (Paclitaxel) |                               | 51.5               | -                          | T1 (41%), T2–3 (59%)          | 0             | 100           | 61.9                 | 38.1            | 100                                  |
| PEONY (Shao et al., 2019) [51]        | PTC     | Taxane (Docetaxel)  | 12                            | 49                 | -                          | T2 (71%), T3 (20%), T4 (9%)   | 52            | 48            | 73                   | 27              | 100                                  |
|                                       | TC      | Taxane (Docetaxel)  |                               | 49                 | -                          | T2 (65%), T3 (26%), T4 (9%)   | 51            | 49            | 81                   | 19              | 100                                  |

C = Chemotherapy; TC = Trastuzumab + chemotherapy, PC = Pertuzumab + chemotherapy; PTC = Pertuzumab + trastuzumab + chemotherapy; PT = Pertuzumab + trastuzumab.

**Table S11.** Risk ratios and 95% confidence intervals of network meta-analysis of total breast conservative surgery (BCS) outcome.

|   |                  |                  |                  |                  |                  |                         |                  |                  |                   |                  |
|---|------------------|------------------|------------------|------------------|------------------|-------------------------|------------------|------------------|-------------------|------------------|
| C | 0.99 (0.77,1.26) | 1.00 (0.70,1.43) | 0.95 (0.71,1.27) | 0.88 (0.61,1.27) | 0.84 (0.56,1.26) | 1.06 (0.75,1.50)        | 0.99 (0.74,1.32) | 1.04 (0.64,1.68) | 1.06 (0.63,1.77)  | 1.07 (0.69,1.67) |
| - | <b>TC</b>        | 1.01 (0.78,1.32) | 0.96 (0.83,1.11) | 0.89 (0.67,1.18) | 0.85 (0.62,1.18) | 1.07 (0.84,1.38)        | 1.00 (0.87,1.15) | 1.05 (0.70,1.60) | 1.07 (0.68,1.68)  | 1.09 (0.75,1.58) |
| - | -                | <b>PC</b>        | 0.95 (0.70,1.29) | 0.88 (0.66,1.17) | 0.84 (0.61,1.17) | 1.06 (0.82,1.37)        | 0.99 (0.73,1.33) | 1.04 (0.68,1.59) | 1.06 (0.67,1.67)  | 1.07 (0.73,1.57) |
| - | -                | -                | <b>LC</b>        | 0.92 (0.68,1.26) | 0.89 (0.62,1.26) | 1.12 (0.84,1.49)        | 1.04 (0.90,1.20) | 1.09 (0.71,1.70) | 1.11 (0.69,1.79)  | 1.13 (0.76,1.68) |
| - | -                | -                | -                | <b>PT</b>        | 0.96 (0.68,1.35) | 1.21 (0.92,1.58)        | 1.12 (0.82,1.53) | 1.18 (0.77,1.82) | 1.21 (0.76,1.92)  | 1.22 (0.83,1.80) |
| - | -                | -                | -                | -                | <b>T-DM1P</b>    | <b>1.26 (1.02,1.55)</b> | 1.17 (0.82,1.67) | 1.24 (0.83,1.83) | 1.26 (0.82,1.93)  | 1.27 (0.90,1.80) |
| - | -                | -                | -                | -                | -                | <b>PTC</b>              | 0.93 (0.70,1.24) | 0.98 (0.70,1.37) | 1.00 (0.69,1.46)  | 1.01 (0.76,1.34) |
| - | -                | -                | -                | -                | -                | -                       | <b>LTC</b>       | 1.05 (0.68,1.63) | 1.07 (0.67,1.72)  | 1.09 (0.73,1.62) |
| - | -                | -                | -                | -                | -                | -                       | -                | <b>T-DM1PC</b>   | 1.02 (0.73,1.41)  | 1.03 (0.67,1.59) |
| - | -                | -                | -                | -                | -                | -                       | -                | -                | <b>PTC_T-DM1P</b> | 1.01 (0.63,1.62) |
| - | -                | -                | -                | -                | -                | -                       | -                | -                | -                 | <b>T-DM1</b>     |

Results of treatment comparisons are read from right to left. For example, the risk ratio (95% confidence intervals) for breast conservative surgery of TC vs C is 0.99 (0.77,1.26). C = Chemotherapy; TC = Trastuzumab + chemotherapy; PC = Pertuzumab + chemotherapy; LC = Lapatinib + chemotherapy; PTC = Pertuzumab + trastuzumab + chemotherapy; LTC = Lapatinib + trastuzumab + chemotherapy; PT = Pertuzumab + trastuzumab; T-DM1P = trastuzumab emtansine + pertuzumab; T-DM1LC = trastuzumab emtansine + lapatinib + chemotherapy; T-DM1PC = trastuzumab emtansine + pertuzumab chemotherapy; PTC\_T-DM1P = pertuzumab + trastuzumab + chemotherapy followed by trastuzumab emtansine + pertuzumab; T-DM1 = Trastuzumab emtansine.
